# Supplementary material for: Reductive silylation of a uranyl dibenzoylmethanate complex: an example of controlled uranyl oxo ligand cleavage
Source: Royal Society of Chemistry journal article supplement (doi:10.1039/c4sc00996g), 2014-05-23
Supplement: c4sc00996g1.pdf [file c4sc00996g1.pdf]

Supporting Information For:

**Reductive Silylation of a Uranyl Dibenzoylmethanate Complex: An Example of  
Controlled Uranyl Oxo Ligand Cleavage**

Elizabeth A. Pedrick,<sup>1</sup> Guang Wu,<sup>1</sup> Nikolas Kaltsoyannis,<sup>2</sup> and Trevor W.

Hayton<sup>\*,1</sup>

*1. Department of Chemistry and Biochemistry, University of California Santa*

*Barbara, Santa Barbara, CA 93106*

*2. Christopher Ingold Laboratories, Department of Chemistry, University College*

*London, 20 Gordon Street, London WC1H 0AJ, United Kingdom*

\*To whom correspondence should be addressed. Email: hayton@chem.ucsb.edu

## Table of Contents

---

|                                                           |     |
|-----------------------------------------------------------|-----|
| Cyclic Voltammetry                                        | S3  |
| Raman Spectrum of $\text{UO}_2(\text{dbm})_2(\text{THF})$ | S4  |
| NMR Spectra                                               | S5  |
| IR Spectra                                                | S19 |
| UV-Vis-NIR Spectra                                        | S23 |
| X-ray Data                                                | S25 |
| Cartesian coordinates and total energies                  | S27 |

---

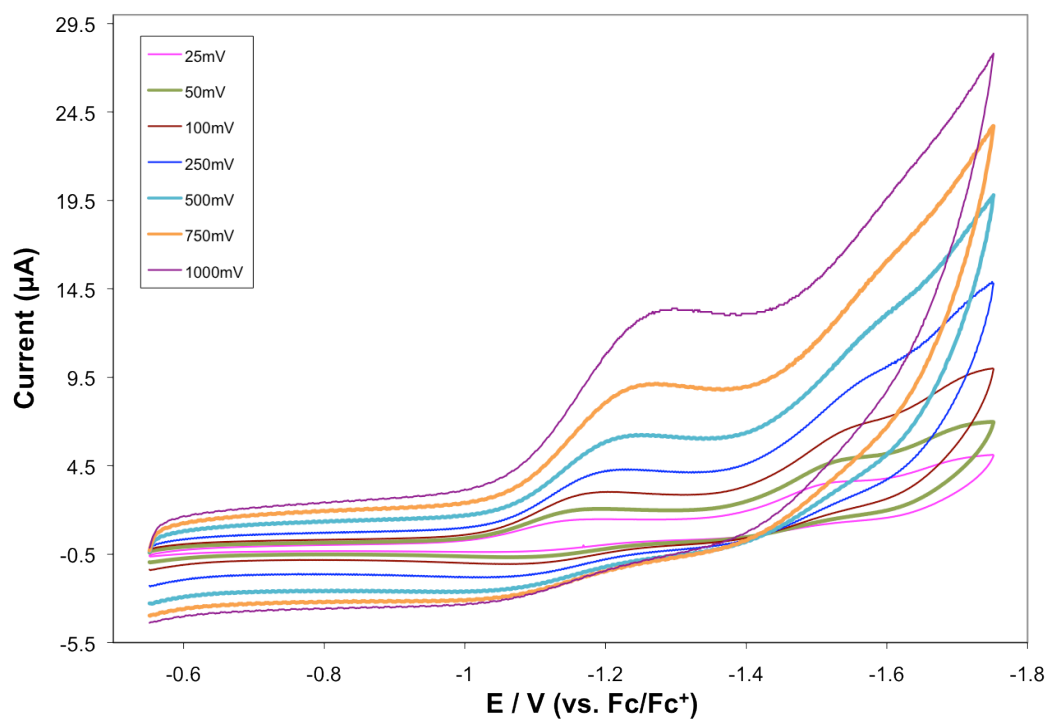

**Figure S1.** Room temperature cyclic voltammogram of  $\text{UO}_2(\text{dbm})_2(\text{THF})$ . Measured in  $\text{CH}_2\text{Cl}_2$  with 0.1 M  $[\text{NBu}_4][\text{PF}_6]$  as supporting electrolyte.

**Table S1.** Electrochemical parameters for  $\text{UO}_2(\text{dbm})_2(\text{THF})$  in  $\text{CH}_2\text{Cl}_2$  (vs.  $\text{Fc}/\text{Fc}^+$ ,  $[\text{NBu}_4][\text{PF}_6]$  as supporting electrolyte).

| Reduction feature | Scan rate, V/s | $E_{p,c}$ , V |                |                   |
|-------------------|----------------|---------------|----------------|-------------------|
|                   | 0.025          | -1.167        |                |                   |
|                   | 0.05           | -1.154        |                |                   |
|                   | 0.1            | -1.189        |                |                   |
|                   | 0.25           | -1.206        |                |                   |
|                   | 0.5            | -1.230        |                |                   |
|                   | 0.75           | -1.248        |                |                   |
|                   | 1              | -1.283        |                |                   |
| Ferrocene         | Scan rate, V/s | $E_{p,a}$ , V | $\Delta E_p^a$ | $i_{p,c}/i_{p,a}$ |
|                   | 0.025          | 0.052         | 0.089          | 1.06              |
|                   | 0.05           | 0.062         | 0.094          | 1.06              |
|                   | 0.1            | 0.051         | 0.109          | 1.05              |
|                   | 0.25           | 0.059         | 0.132          | 1.07              |
|                   | 0.5            | 0.072         | 0.160          | 1.09              |
|                   | 0.75           | 0.082         | 0.155          | 1.13              |
|                   | 1              | 0.086         | 0.200          | 1.15              |

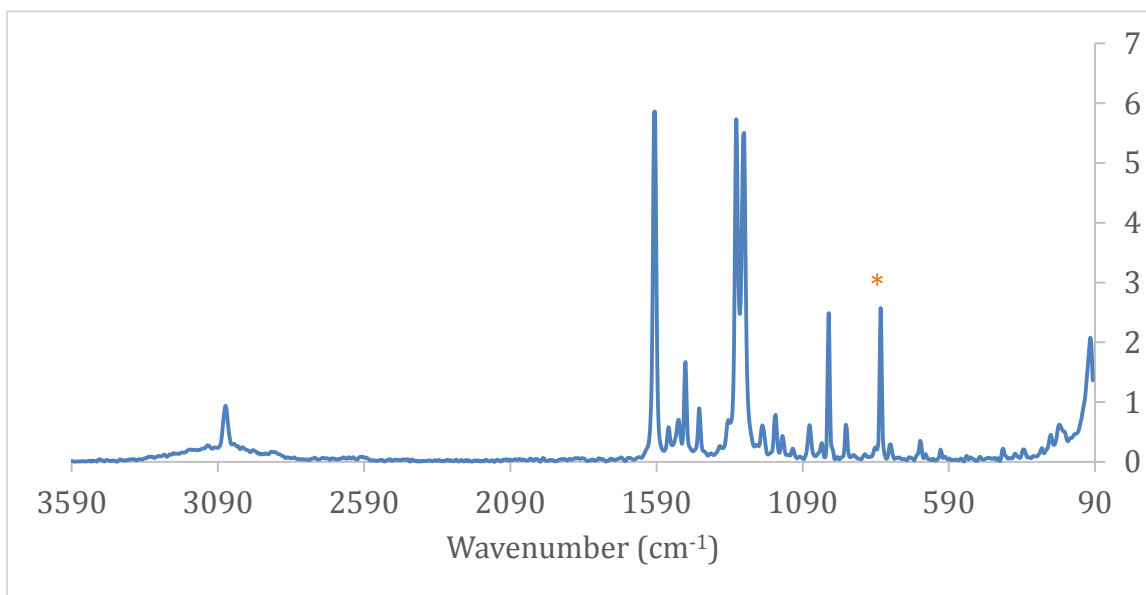

**Figure S2.** Solid state Raman spectrum of  $\text{UO}_2(\text{dbm})_2(\text{THF})$ .  $\text{U}=\text{O}$   $\nu_{\text{sym}}$  stretch is observed at  $823 \text{ cm}^{-1}$  (\*).

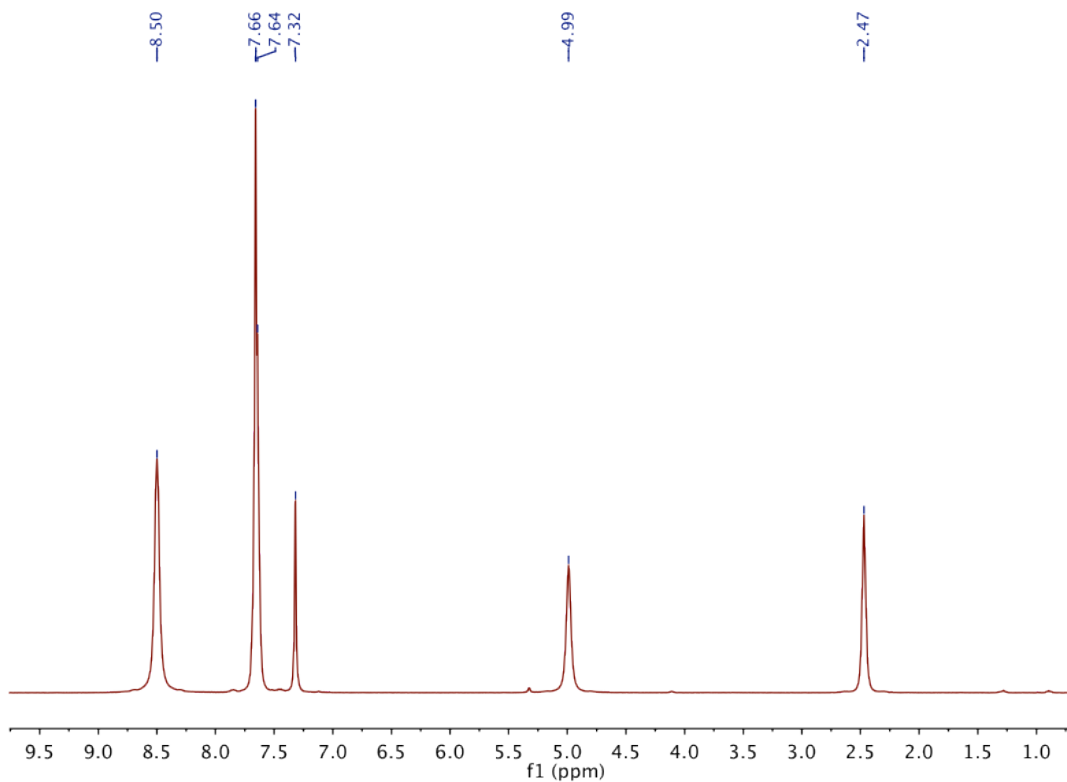

**Figure S3.**  $^1\text{H}$  NMR spectrum of  $\text{UO}_2(\text{dbm})_2(\text{THF})$  in  $\text{CD}_2\text{Cl}_2$  at  $25\text{ }^\circ\text{C}$ .

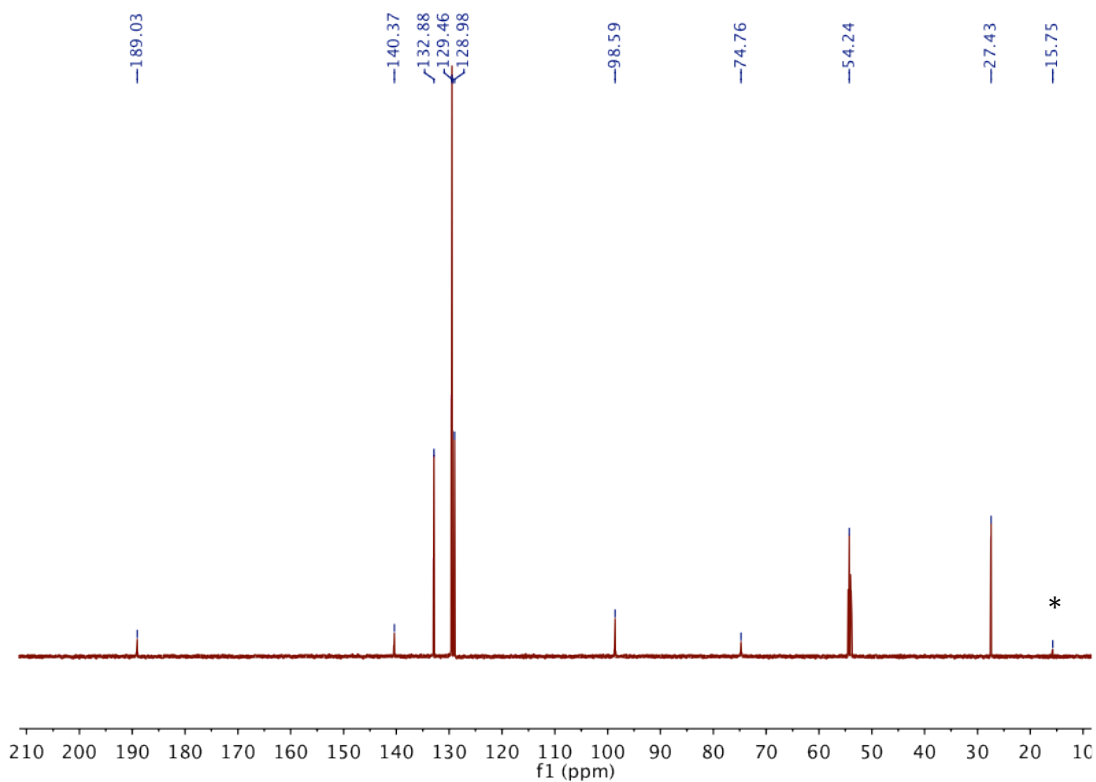

**Figure S4.**  $^{13}\text{C}\{^1\text{H}\}$  NMR spectrum of  $\text{UO}_2(\text{dbm})_2(\text{THF})$  in  $\text{CD}_2\text{Cl}_2$  at  $25\text{ }^\circ\text{C}$ . Asterisk indicates the presence of hexanes.

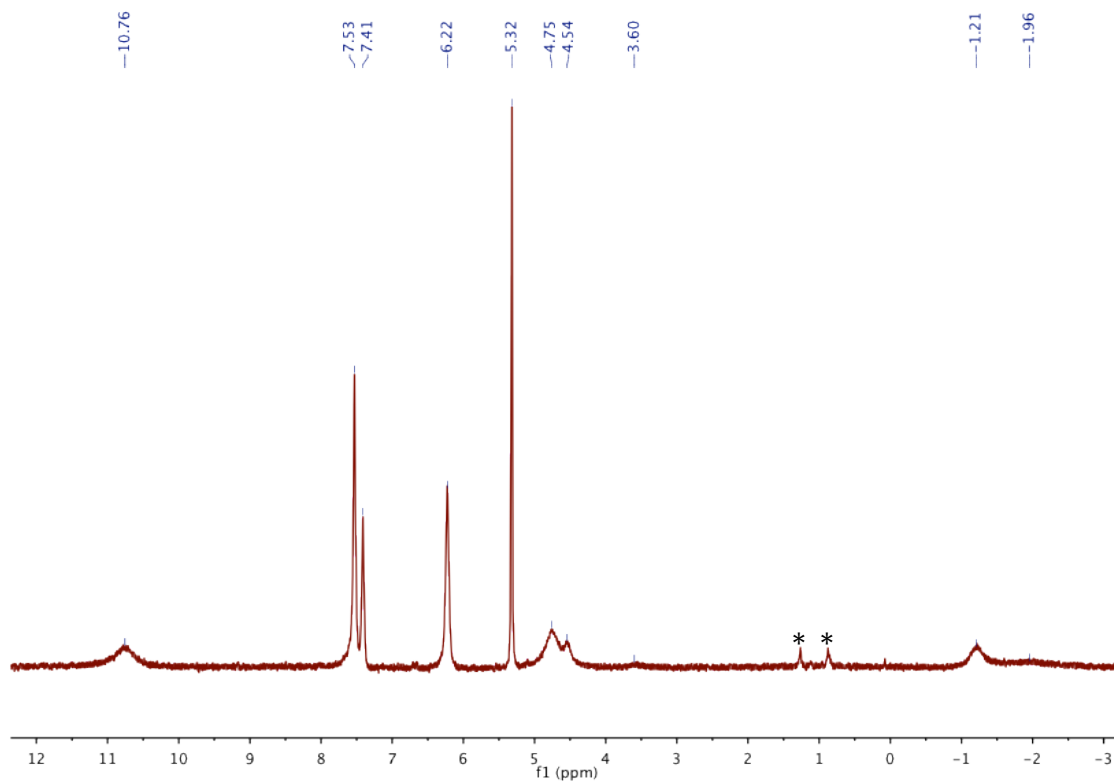

**Figure S5.**  $^1\text{H}$  NMR spectrum of **1** in  $\text{CD}_2\text{Cl}_2$  at 25 °C. Asterisks indicate the presence of hexanes.

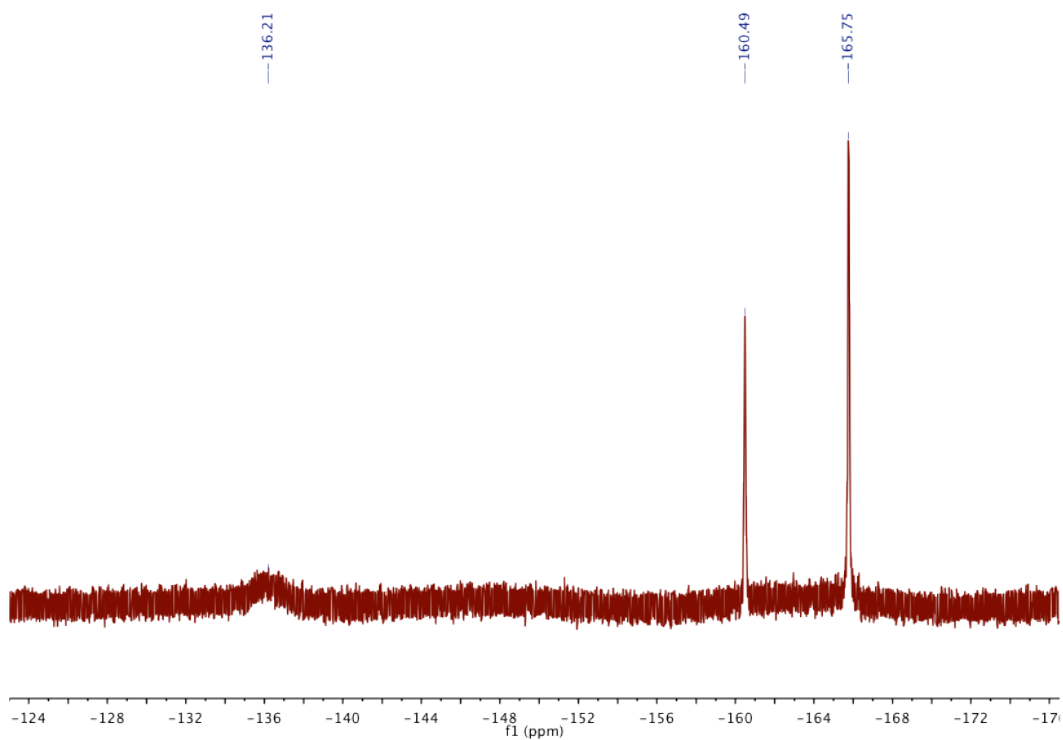

**Figure S6.**  $^{19}\text{F}\{^1\text{H}\}$  NMR spectrum of **1** in  $\text{CD}_2\text{Cl}_2$  at 25 °C.

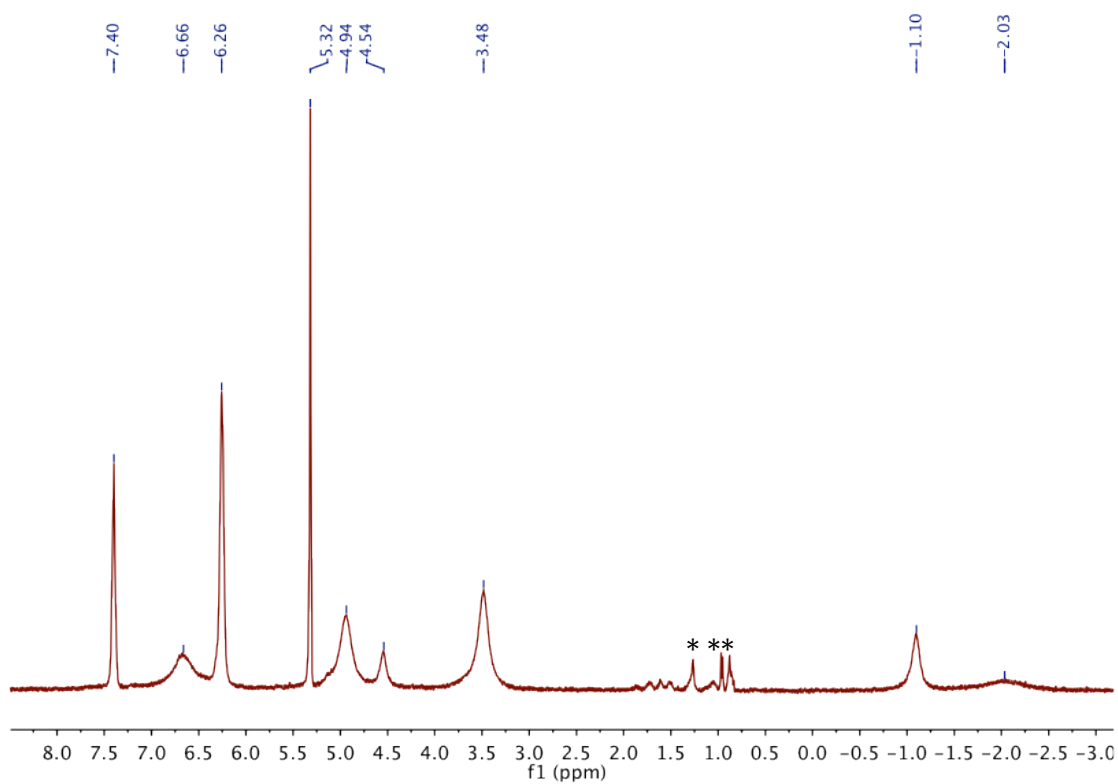

**Figure S7.**  $^1\text{H}$  NMR spectrum of **2** in  $\text{CD}_2\text{Cl}_2$  at 25 °C. Asterisks indicate the presence of hexanes.

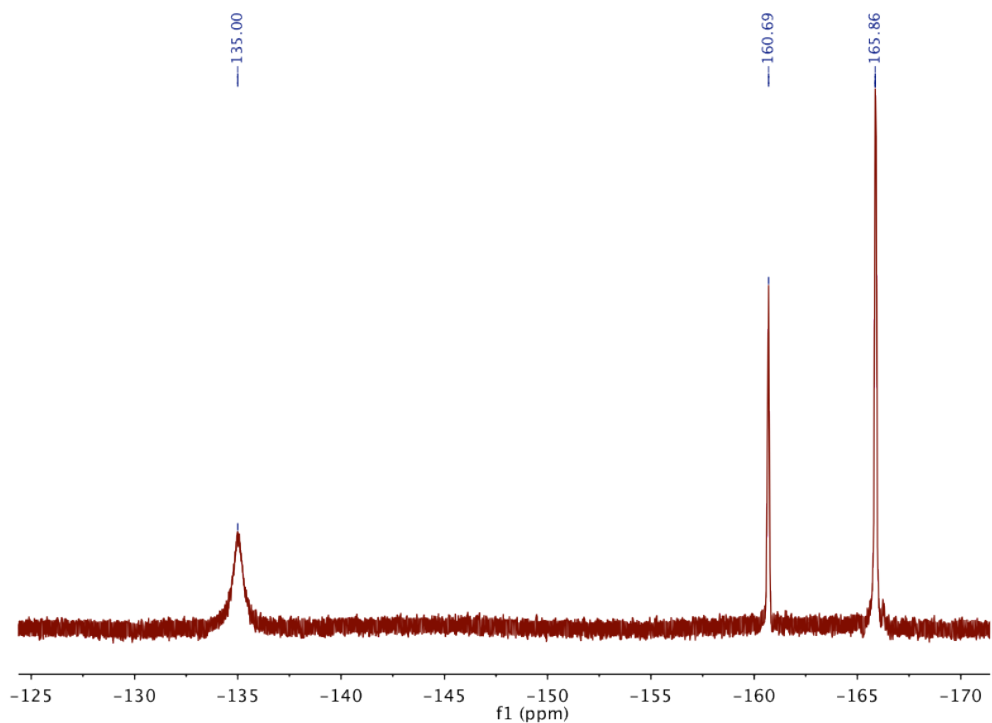

**Figure S8.**  $^{19}\text{F}\{^1\text{H}\}$  NMR spectrum of **2** in  $\text{CD}_2\text{Cl}_2$  at 25 °C.

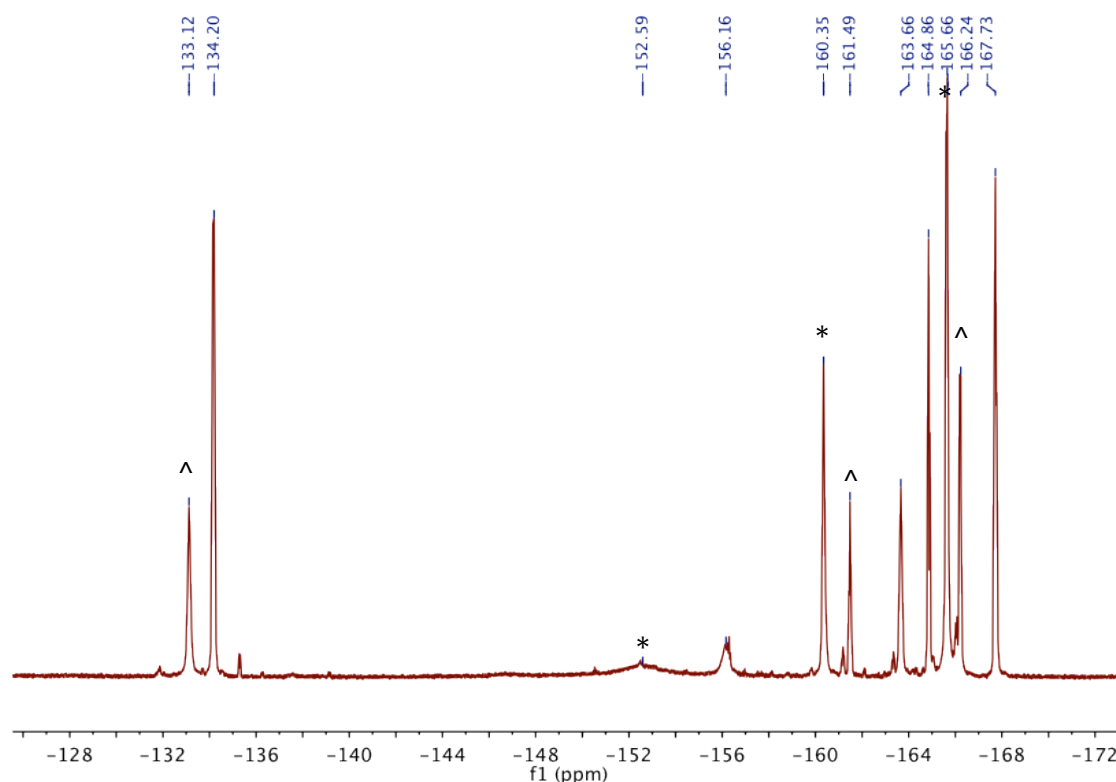

**Figure S9.**  $^{19}\text{F}\{^1\text{H}\}$  NMR spectrum of the *in situ* reaction of  $\text{UO}_2(\text{dbm})_2(\text{THF})$  with 1 equiv of  $\text{B}(\text{C}_6\text{F}_5)_3$  and 2 equiv  $\text{HSiEt}_3$  in  $\text{CD}_2\text{Cl}_2$ ; after 24 h at 25 °C. **Experimental Details:** An orange  $\text{CD}_2\text{Cl}_2$  solution (1 mL) containing  $\text{UO}_2(\text{dbm})_2(\text{THF})$  (24.1 mg, 0.030 mmol) was sealed in a J. Young NMR tube, and the  $^1\text{H}$  and  $^{19}\text{F}\{^1\text{H}\}$  NMR spectra were recorded. Then a colorless  $\text{CD}_2\text{Cl}_2$  solution (0.75 mL) of  $\text{B}(\text{C}_6\text{F}_5)_3$  (16.0 mg, 0.031 mmol) and  $\text{HSiEt}_3$  (10  $\mu\text{L}$ , 0.061 mmol) was added drop-wise, resulting in a color change to deep red. The tube was sealed, and the  $^1\text{H}$  and  $^{19}\text{F}\{^1\text{H}\}$  NMR spectra were recorded after standing at room temperature for 24 h ( $^{19}\text{F}$  spectrum shown above). These spectra revealed the formation of **2** and **3**, in a 1:2 ratio, which was determined by comparing the integrations of the *meta* C–F resonances in the  $^{19}\text{F}$  NMR spectrum. Asterisks indicate resonances assignable to complex **3**, while  $\wedge$  indicates resonances assignable to complex **2**. Several other  $^{19}\text{F}$  resonances are observed that were not assignable to any known species.



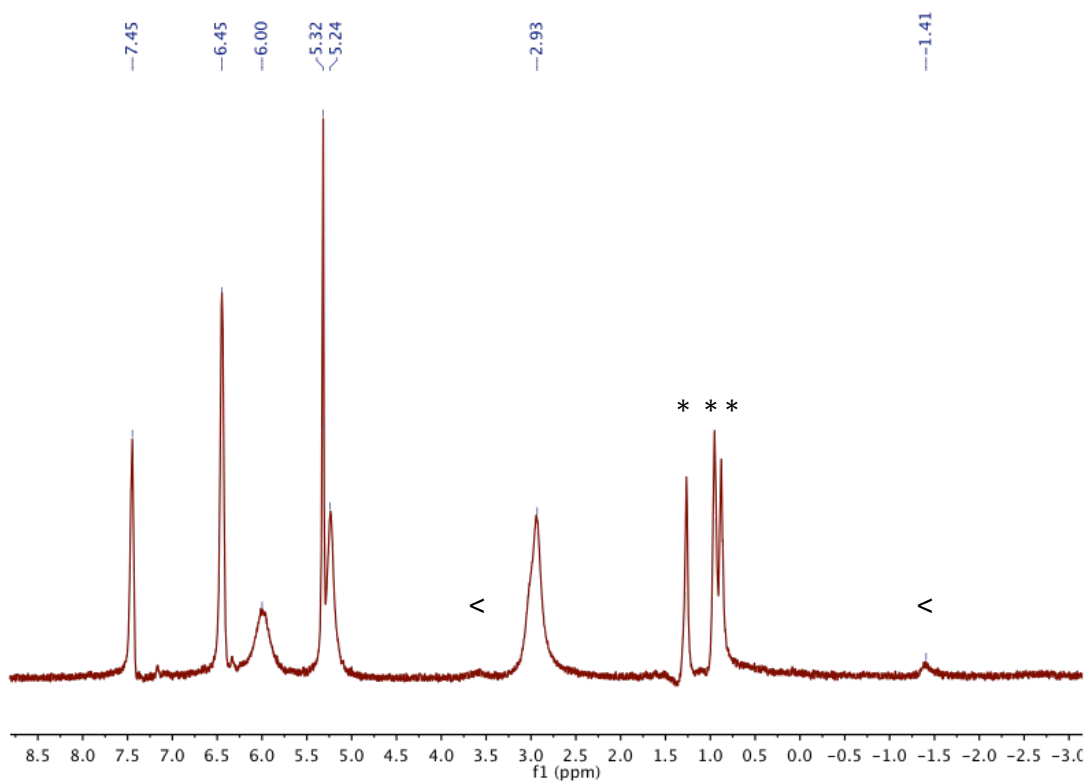

**Figure S10.**  $^1\text{H}$  NMR spectrum of **3** in  $\text{CD}_2\text{Cl}_2$  at  $25\text{ }^\circ\text{C}$ . < indicates resonances assignable to complex **2**. Asterisks indicate the presence of hexanes.

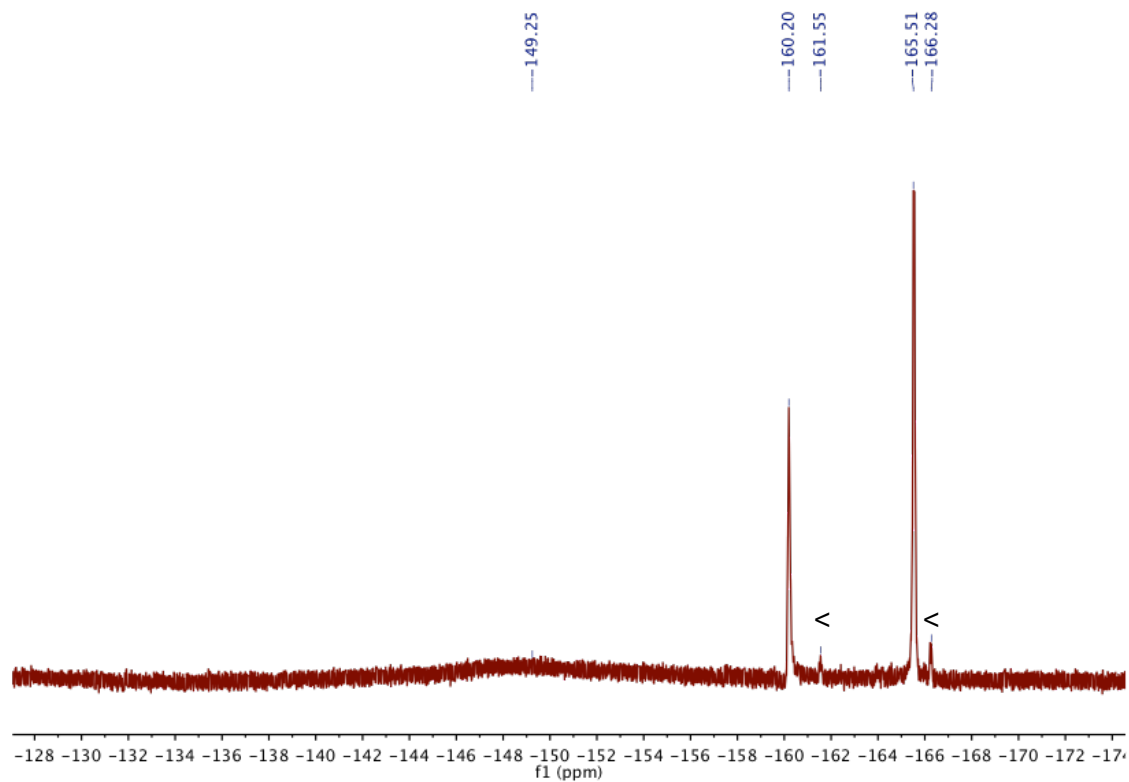

**Figure S11.**  $^{19}\text{F}\{^1\text{H}\}$  NMR spectrum of **3** in  $\text{CD}_2\text{Cl}_2$  at  $25\text{ }^\circ\text{C}$ . < indicates resonances assignable to complex **2**.

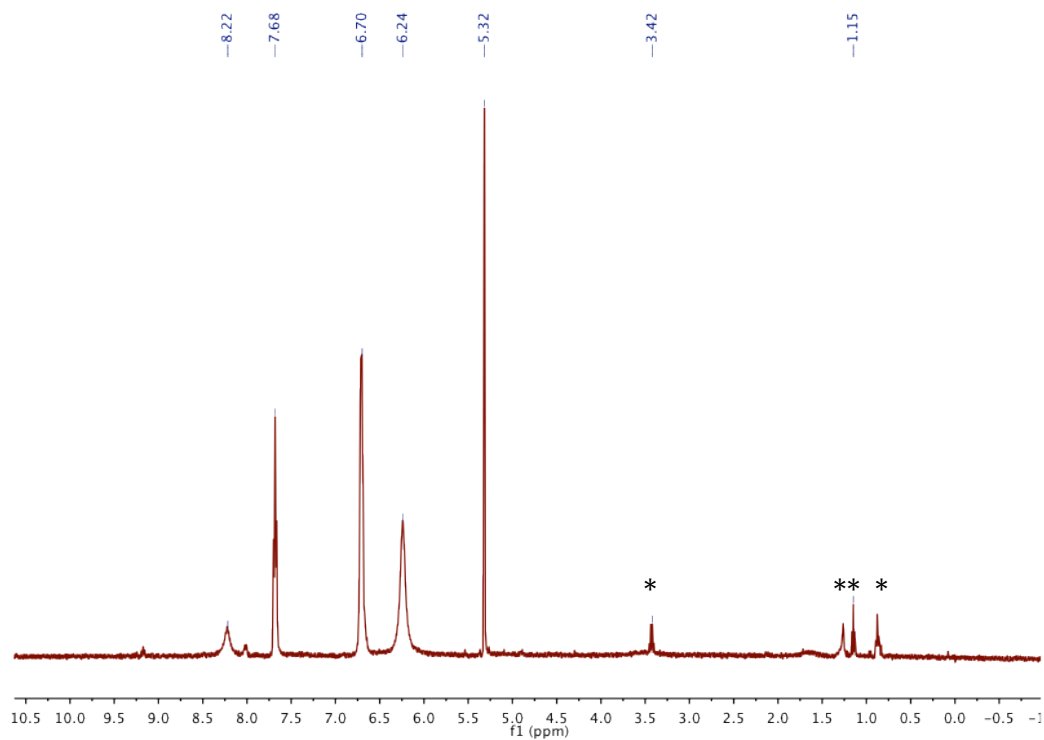

**Figure S12.**  $^1\text{H}$  NMR spectrum of **4** in  $\text{CD}_2\text{Cl}_2$  at  $25\text{ }^\circ\text{C}$ . Asterisks indicate the presence of hexanes and  $\text{Et}_2\text{O}$ .

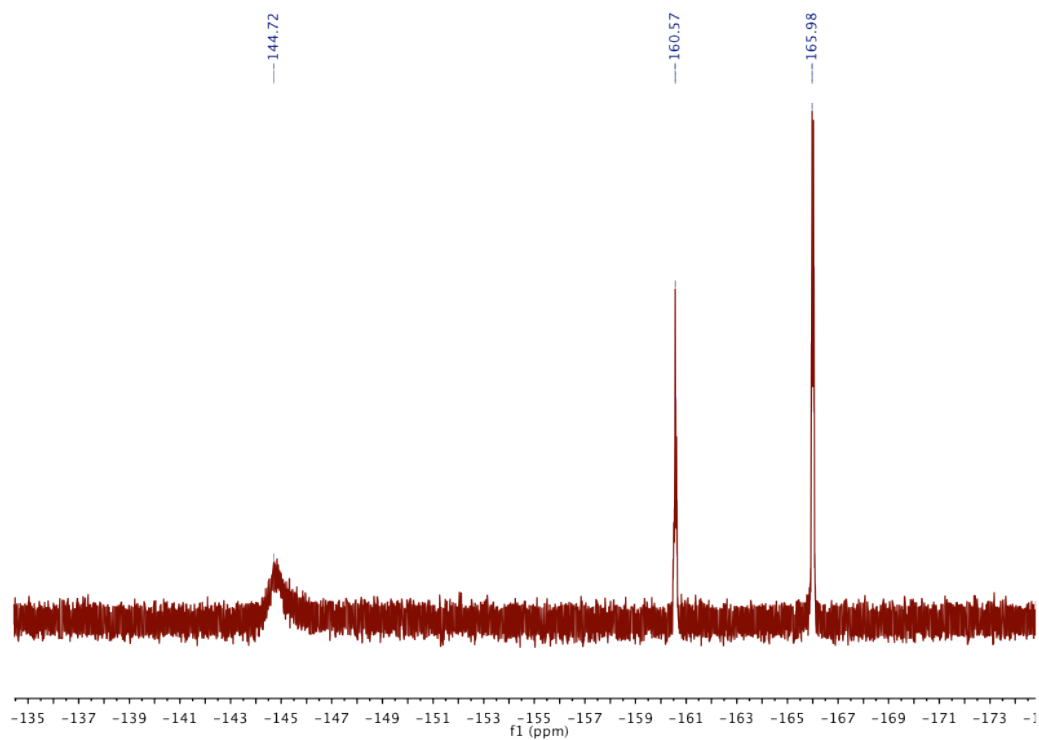

**Figure S13.**  $^{19}\text{F}\{^1\text{H}\}$  NMR spectrum of **4** in  $\text{CD}_2\text{Cl}_2$  at  $25\text{ }^\circ\text{C}$ .

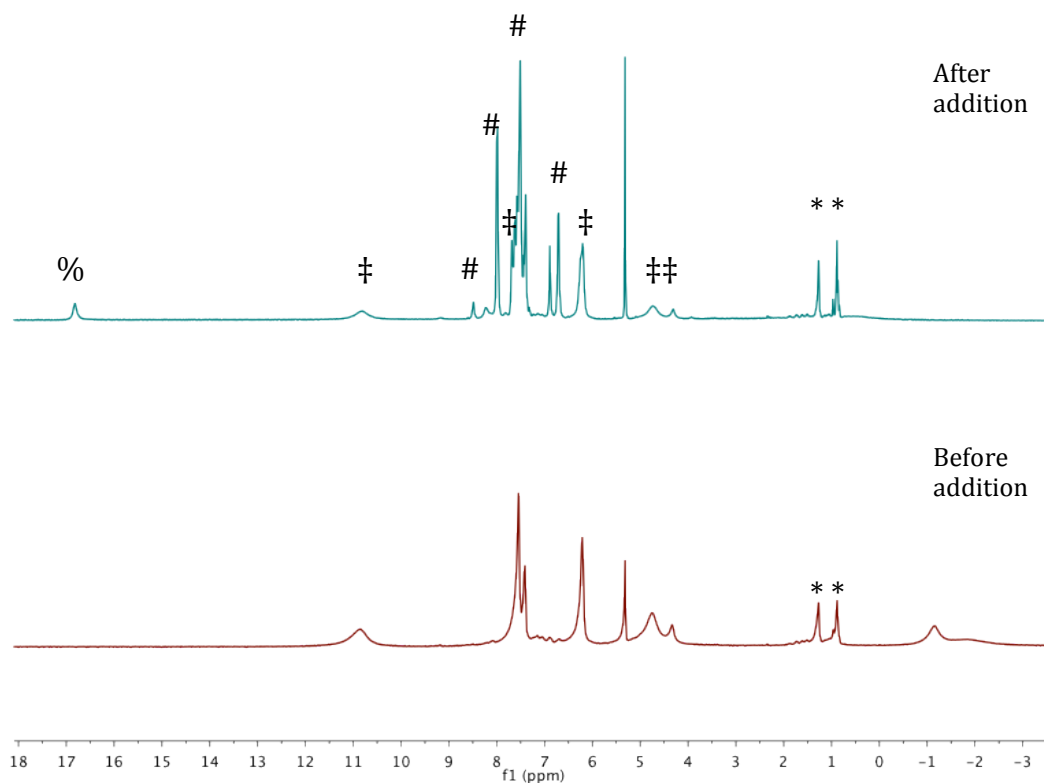

**Figure S14.** <sup>1</sup>H NMR spectra of the in situ formation of **4** from **1** in CD<sub>2</sub>Cl<sub>2</sub> at 25 °C. **Experimental details:** A red orange CD<sub>2</sub>Cl<sub>2</sub> solution (1 mL) containing **1** (15.1 mg, 0.010 mmol) was sealed in a J. Young NMR tube, and the <sup>1</sup>H and <sup>19</sup>F{<sup>1</sup>H} NMR spectra were recorded (bottom spectrum). Then a colorless CD<sub>2</sub>Cl<sub>2</sub> solution (0.5 mL) of H(dbm) (3.3 mg, 0.014 mmol) was added drop-wise, resulting in a color change to deep red. The tube was sealed, and the <sup>1</sup>H and <sup>19</sup>F{<sup>1</sup>H} NMR spectra were re-recorded (top spectrum). These spectra revealed the presence of **1** and **4**, in a 3:2 ratio, according to the integrations of the *ortho* C–F resonances in the <sup>19</sup>F NMR spectrum (Figure S15). ‡ indicates resonances assignable to complex **1**, while # indicates resonances assignable to complex **4**, and % indicates resonances assignable to H(dbm). Asterisks indicate the presence of hexanes.

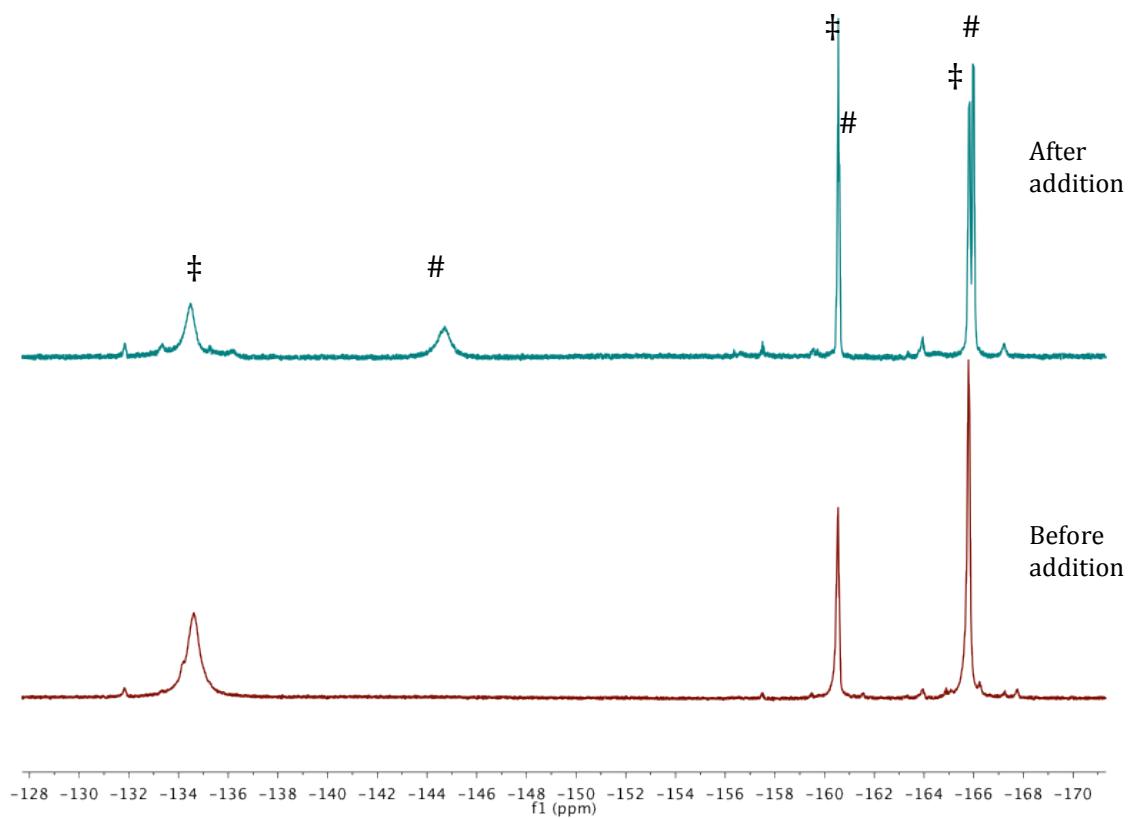

**Figure S15.**  $^{19}\text{F}\{^1\text{H}\}$  NMR spectra of the in situ formation of **4** from **1** in  $\text{CD}_2\text{Cl}_2$  at 25  $^\circ\text{C}$ . ‡ indicates resonances assignable to complex **1**, while # indicates resonances assignable to complex **4**.

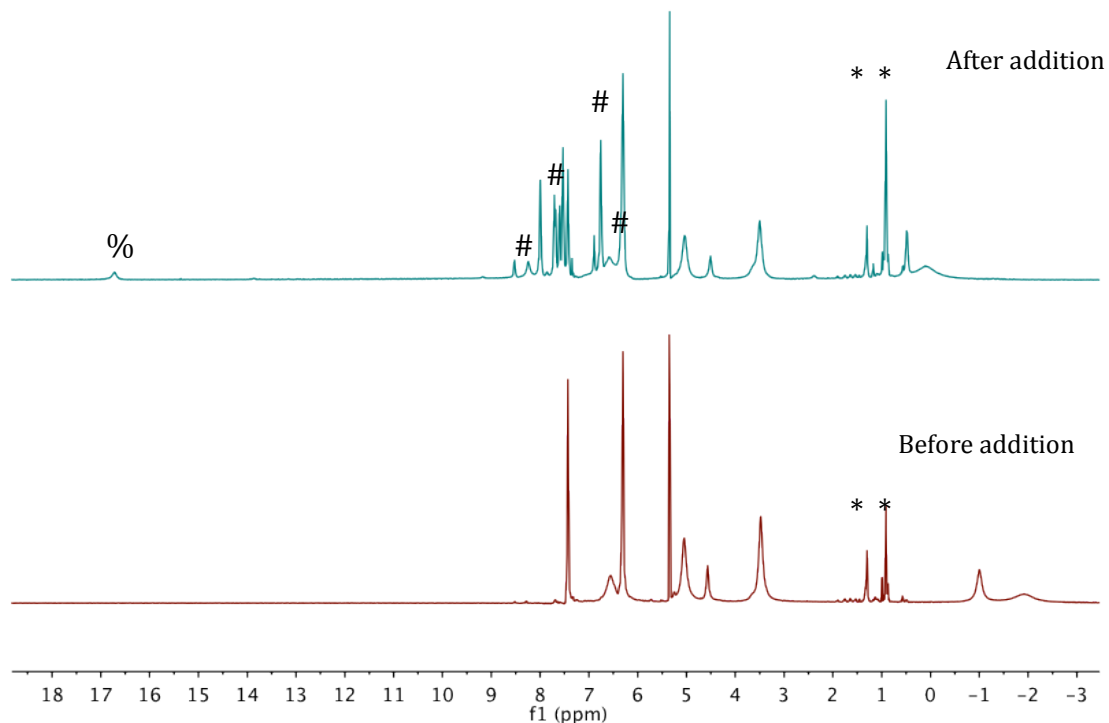

**Figure S16.**  $^1\text{H}$  NMR spectra of the in situ formation of **4** from **2** in  $\text{CD}_2\text{Cl}_2$  at  $25\text{ }^\circ\text{C}$  (500 MHz). **Experimental details:** A red orange  $\text{CD}_2\text{Cl}_2$  solution (1 mL) containing **2** (29.2 mg, 0.021 mmol) was sealed in a J. Young NMR tube, and the  $^1\text{H}$  and  $^{13}\text{C}\{^1\text{H}\}$  NMR spectra were recorded (bottom spectrum). Then a colorless  $\text{CD}_2\text{Cl}_2$  solution (0.5 mL) of H(dbm) (4.9 mg, 0.022 mmol) was added drop-wise, resulting in a color change to deep red. The tube was sealed, and the  $^1\text{H}$  and  $^{13}\text{C}\{^1\text{H}\}$  NMR spectra were re-recorded. These spectra revealed the presence of **2** and **4**, in a 3:2 ratio, according to the integration of the  $^1\text{H}$  NMR spectrum. # indicates resonances assignable to complex **4**, and % indicates resonances assignable to H(dbm). Asterisks indicate the presence of hexanes.

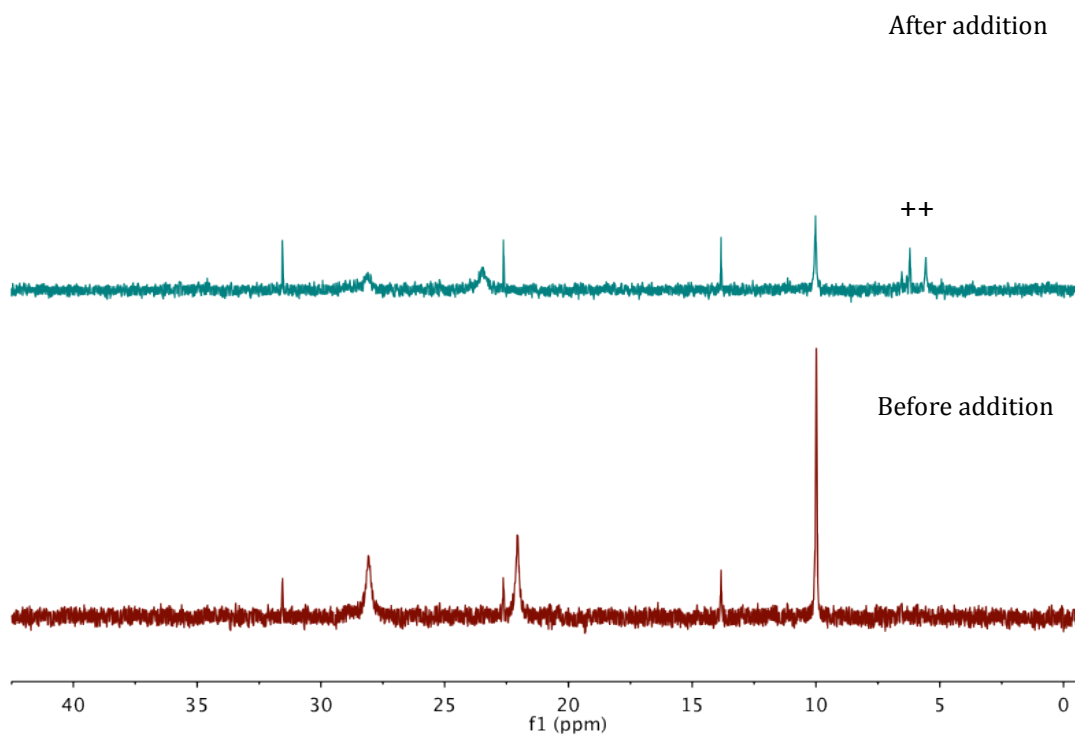

**Figure S17.**  $^{13}\text{C}\{^1\text{H}\}$  NMR spectra of the in situ formation of **4** from **2** in  $\text{CD}_2\text{Cl}_2$  at 25 °C (500 MHz). + indicates resonances assignable to  $\text{HOSiEt}_3$ .

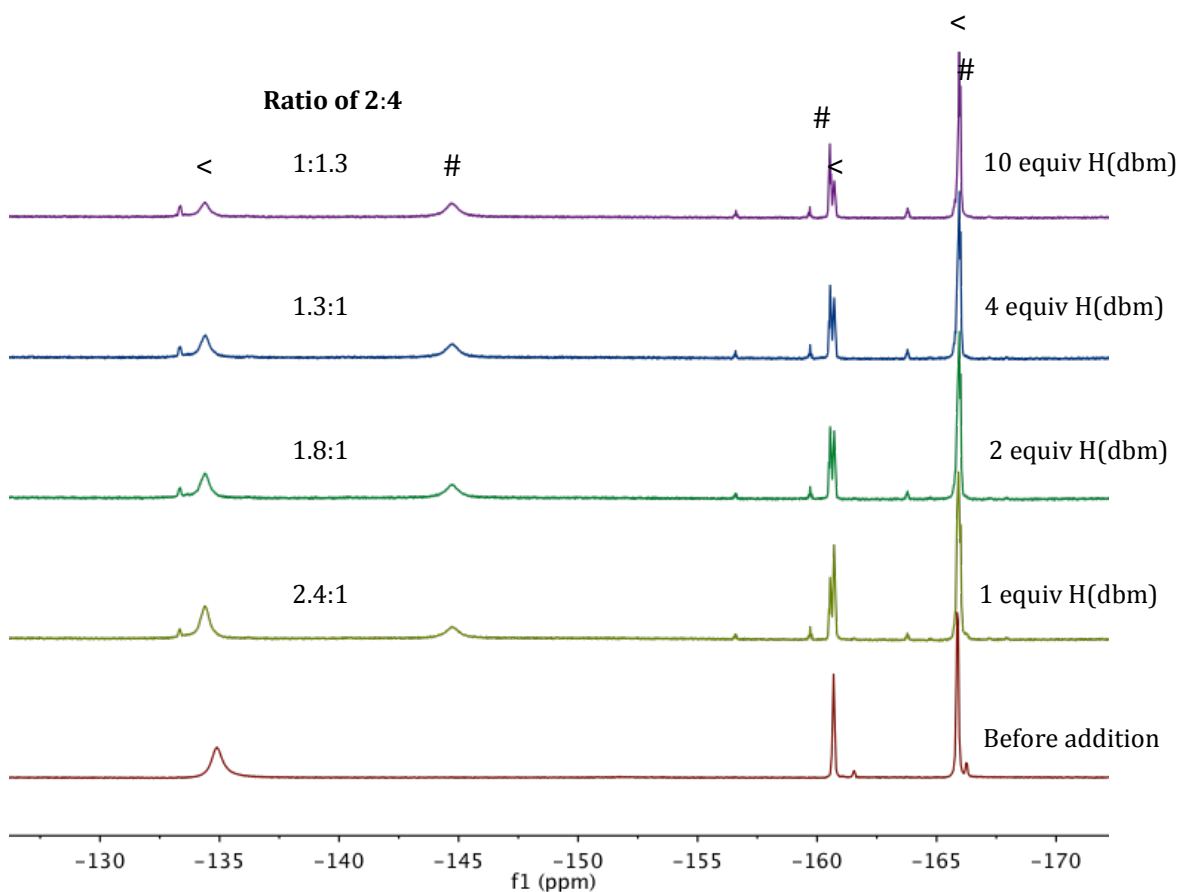

**Figure S18.**  $^{19}\text{F}\{^1\text{H}\}$  NMR spectrum of the in situ formation of **4** from **2** in  $\text{CD}_2\text{Cl}_2$  at 25 °C. **Experimental details:** A red orange  $\text{CD}_2\text{Cl}_2$  solution (1 mL) containing **2** (24.5 mg, 0.017 mmol) was sealed in a J. Young NMR tube, and the  $^1\text{H}$  and  $^{19}\text{F}\{^1\text{H}\}$  NMR spectra were recorded. Then a colorless  $\text{CD}_2\text{Cl}_2$  solution (0.5 mL) of H(dbm) (4.5 mg, 0.020 mmol) was added drop-wise, resulting in a color change to deep red. The tube was sealed, and the  $^1\text{H}$  and  $^{19}\text{F}\{^1\text{H}\}$  NMR spectra were re-recorded ( $^{19}\text{F}\{^1\text{H}\}$  spectrum shown above). These spectra revealed the presence of **2** and **4**, in a 2.4:1 ratio, as determined by comparing the integrations of the *ortho* C–F resonances in the  $^{19}\text{F}$  NMR spectrum. A second aliquot of H(dbm) (4.6 mg, 0.020 mmol) was added as a  $\text{CD}_2\text{Cl}_2$  solution (0.5 mL), at which point the  $^1\text{H}$  and  $^{19}\text{F}\{^1\text{H}\}$  NMR spectra were re-recorded. These spectra revealed the presence of **2** and **4**, in a 1.8:1 ratio. A third aliquot of H(dbm) (8.7 mg, 0.039 mmol) was added as a  $\text{CD}_2\text{Cl}_2$  solution (0.5 mL), which resulted in the formation of **2** and **4**, in a 1.3:1 ratio. A fourth aliquot of H(dbm) (23.4 mg, 0.105 mmol) was added as a  $\text{CD}_2\text{Cl}_2$  solution (0.5 mL), which resulted in the formation of **2** and **4**, in a 1:1.3 ratio. < indicates resonances assignable to complex **2**, while # indicates resonances assignable to complex **4**.



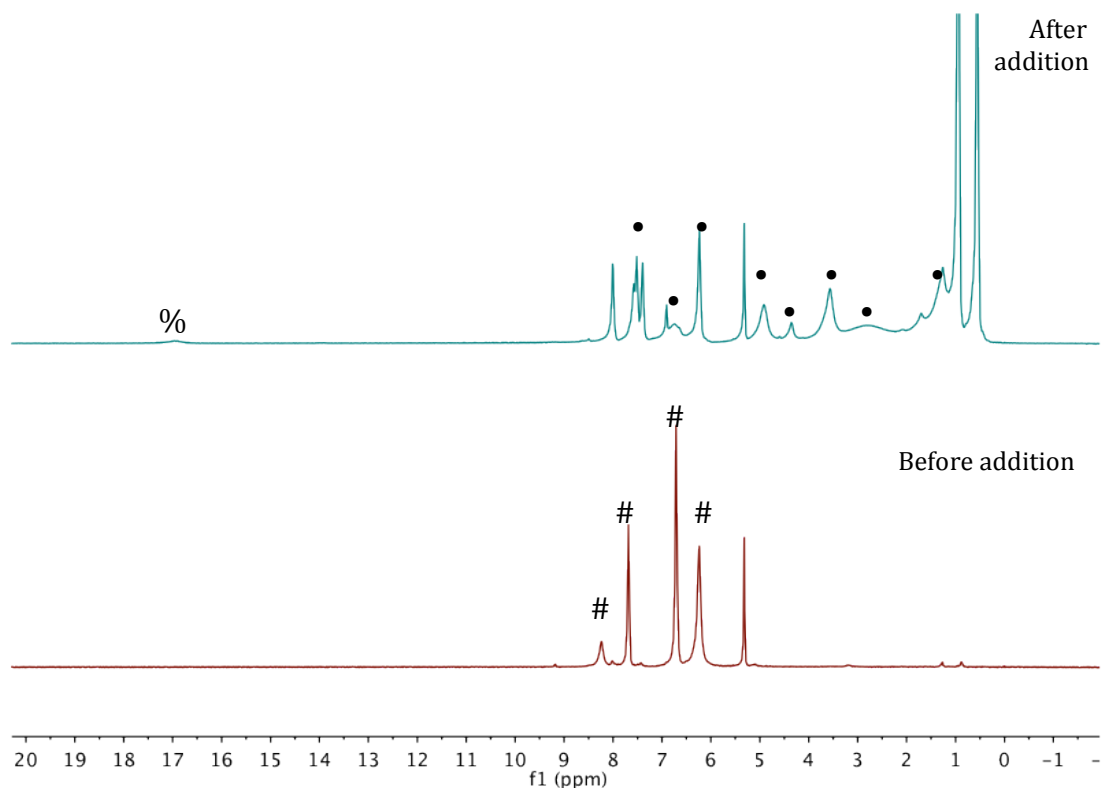

**Figure S19.**  $^1\text{H}$  NMR spectra of the in situ formation of **2** from **4** in  $\text{CD}_2\text{Cl}_2$  at  $25^\circ\text{C}$ . **Experimental details.** A dark red  $\text{CD}_2\text{Cl}_2$  solution (1 mL) containing **4** (9.8 mg, 0.007 mmol) was sealed in a J. Young NMR tube, and the  $^1\text{H}$  and  $^{19}\text{F}\{^1\text{H}\}$  NMR spectra were recorded (bottom spectrum). Then  $\text{HOSiEt}_3$  (3  $\mu\text{L}$ , 0.020 mmol) was added, resulting in a color change to red-orange. After standing for 1 h at room temperature, THF (2  $\mu\text{L}$ , 0.025 mmol) was added to the reaction mixture and  $^1\text{H}$  and  $^{19}\text{F}\{^1\text{H}\}$  NMR spectra were re-recorded (top spectrum). These spectra revealed the formation of complex **2** and H(dbm), along with complete consumption of complex **4**. • indicates resonances assignable to complex **2**, while # indicates resonances assignable to complex **4**, and % indicates resonances assignable to H(dbm).

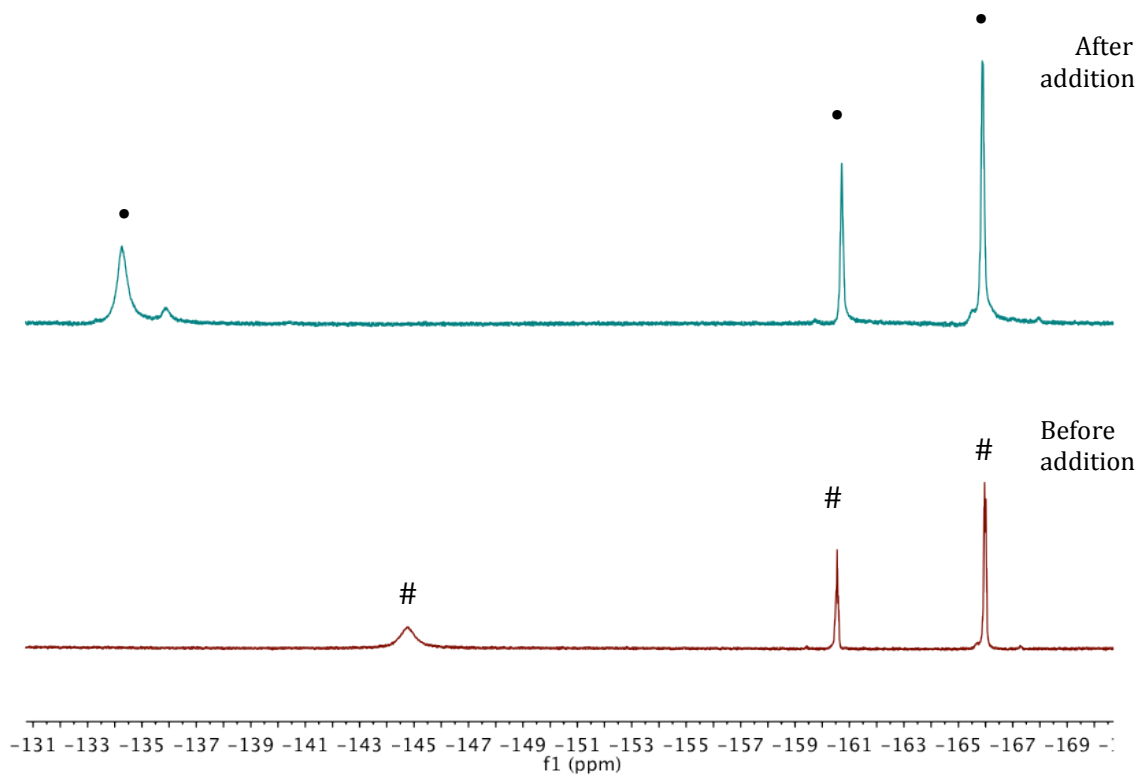

**Figure S20.**  $^{19}\text{F}\{^1\text{H}\}$  NMR spectra of the in situ formation of **2** from **4** in  $\text{CD}_2\text{Cl}_2$  at 25 °C. • indicates resonances assignable to complex **2**, while # indicates resonances assignable to complex **4**.

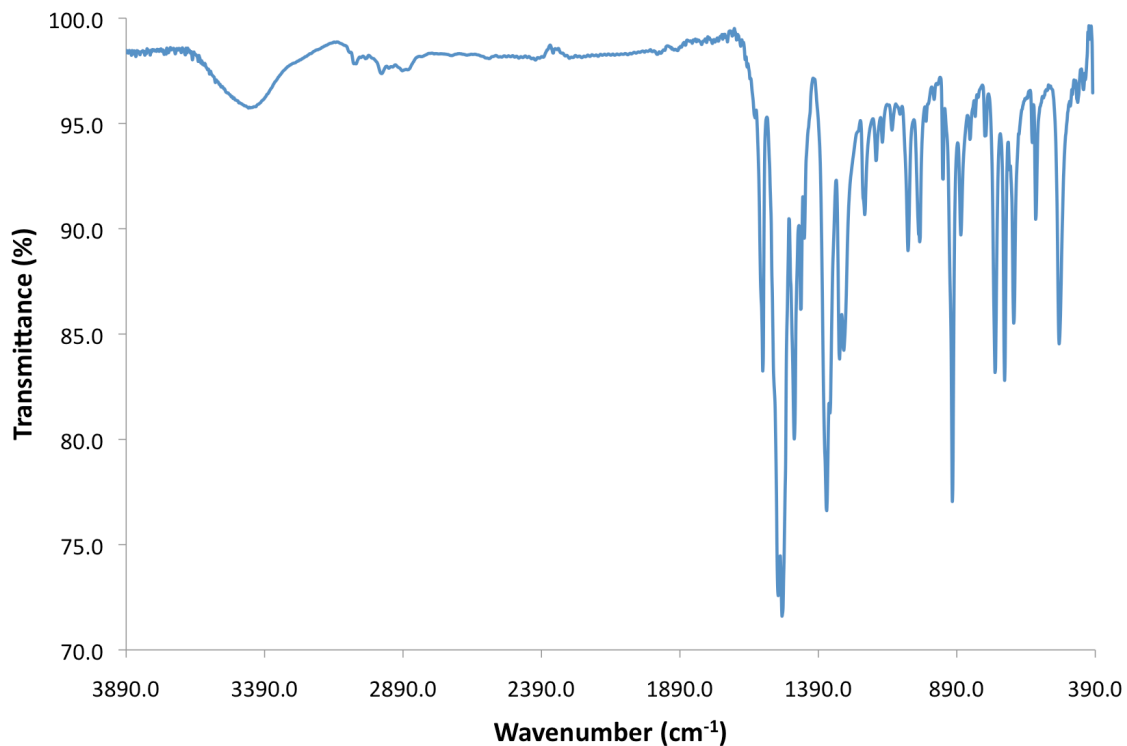

**Figure S21.** IR spectrum of  $\text{UO}_2(\text{dbm})_2(\text{THF})$  (as KBr pellet).

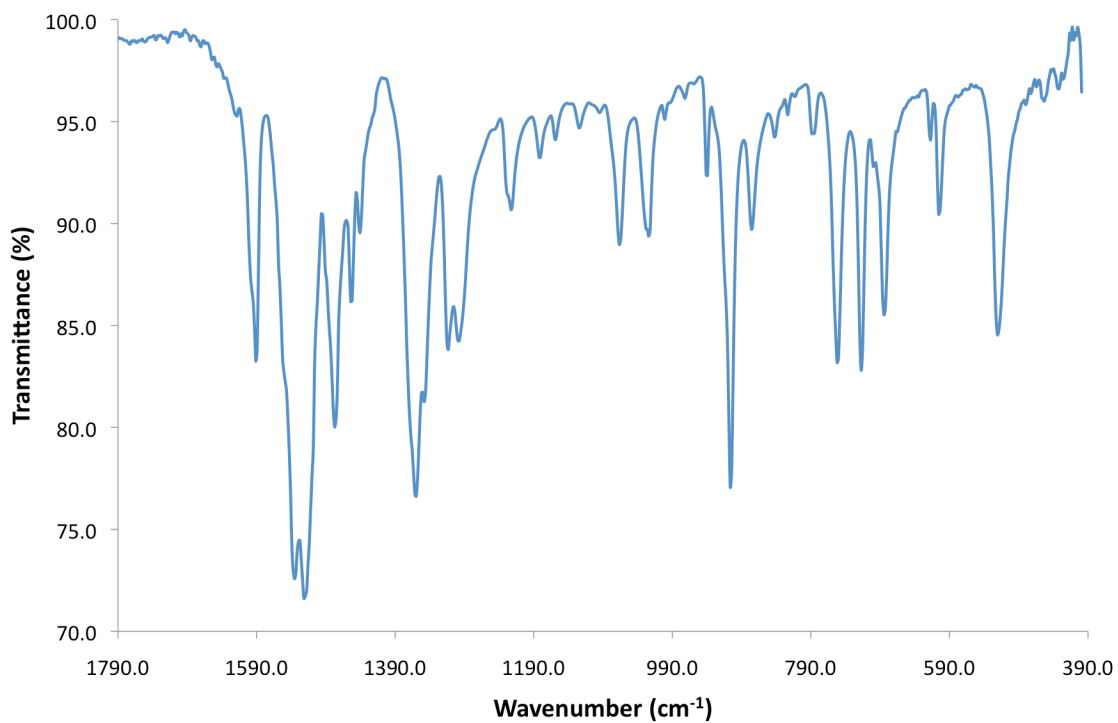

**Figure S22.** Partial IR spectrum of  $\text{UO}_2(\text{dbm})_2(\text{THF})$  (as KBr pellet).

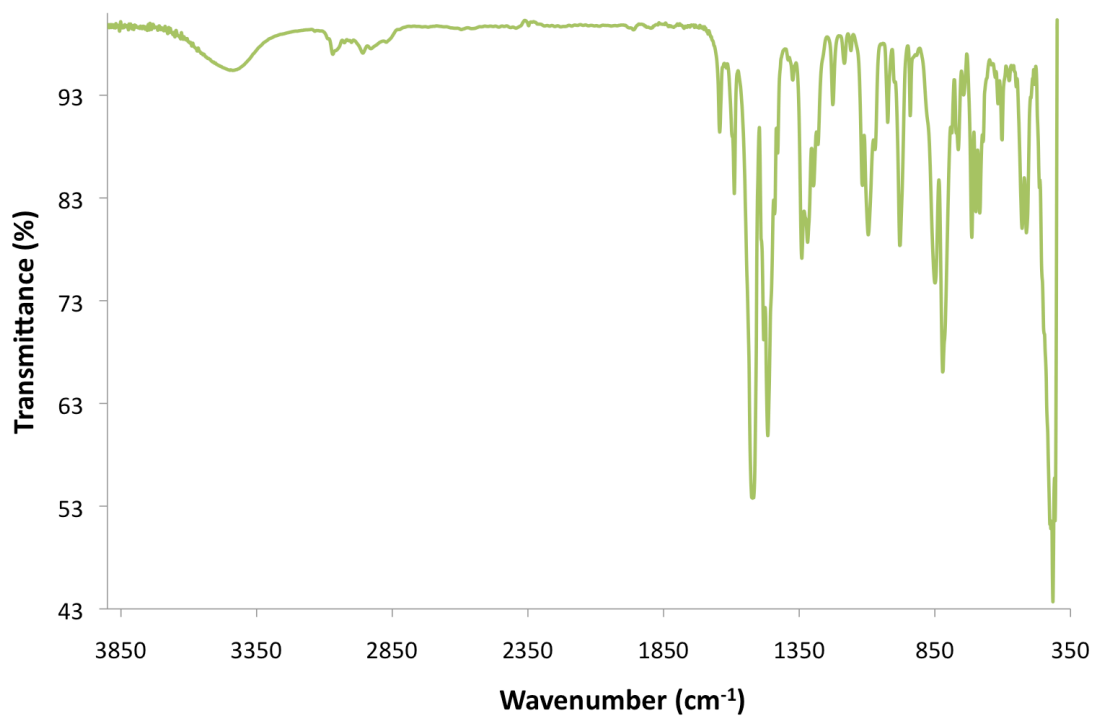

**Figure S23.** IR spectrum of complex **1** (as KBr pellet).

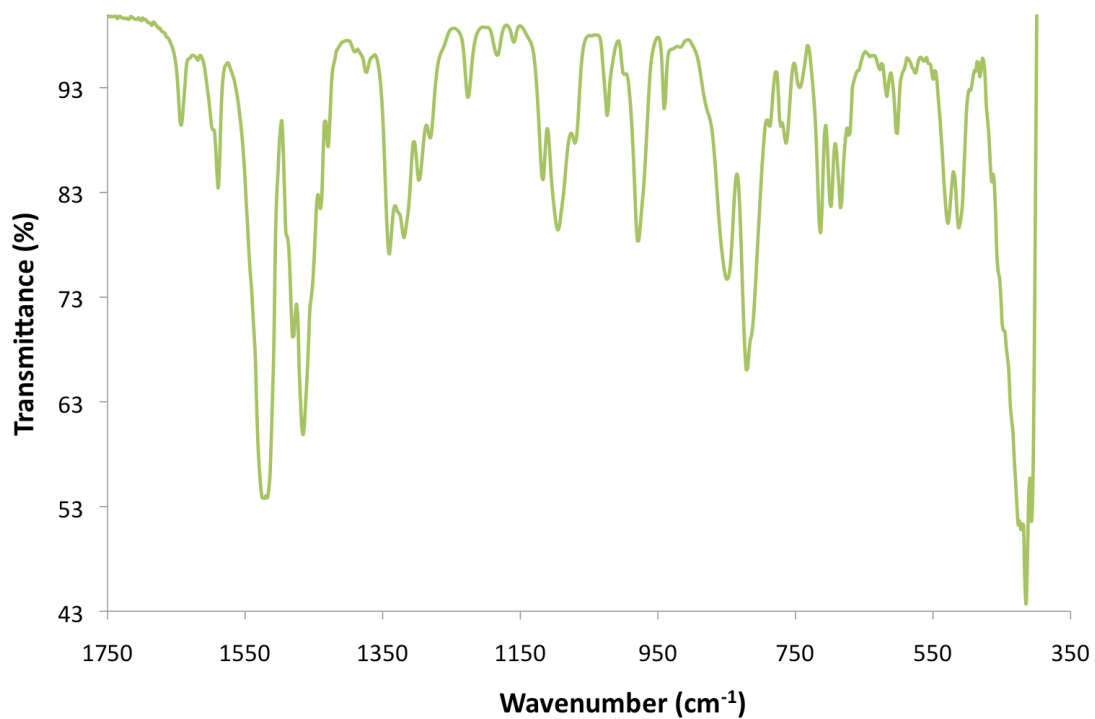

**Figure S24.** Partial IR spectrum of complex **1** (as KBr pellet).

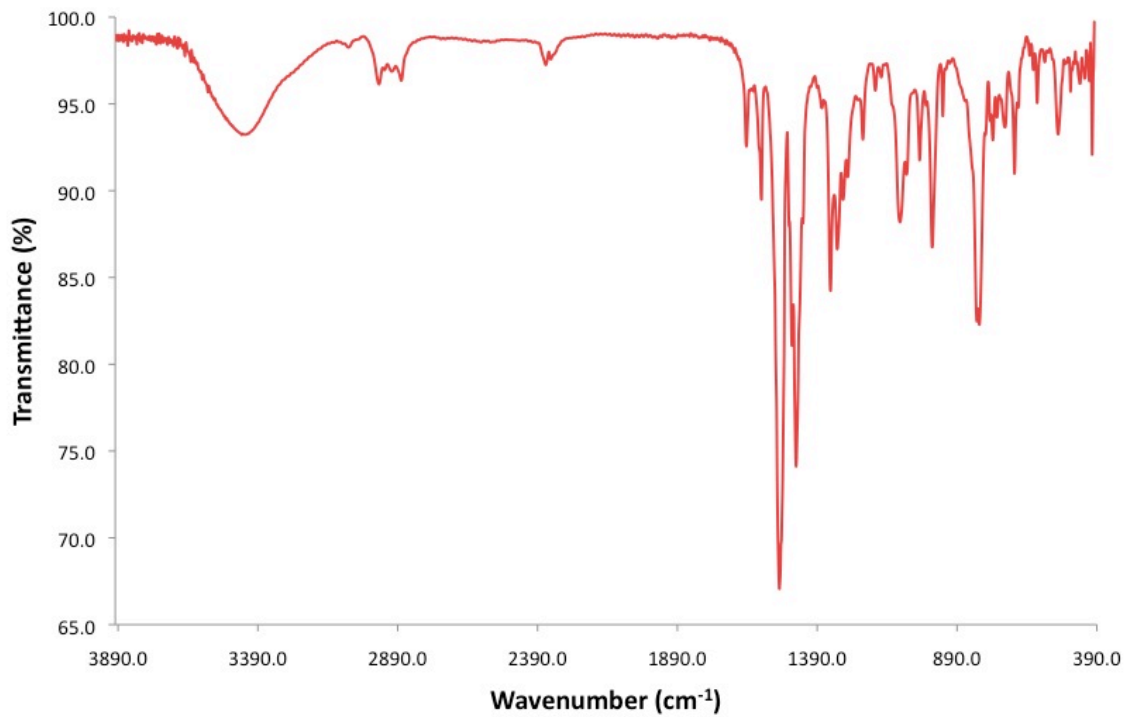

**Figure S25.** IR spectrum of complex **2** (as KBr pellet).

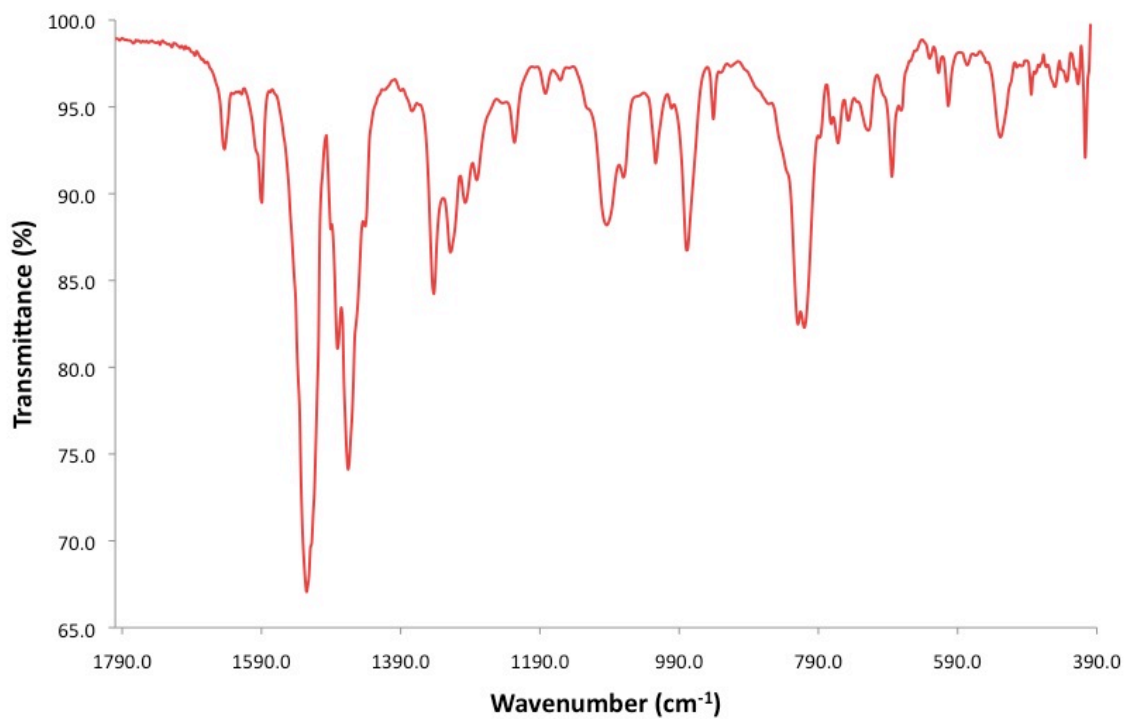

**Figure S26.** Partial IR spectrum of complex **2** (as KBr pellet).

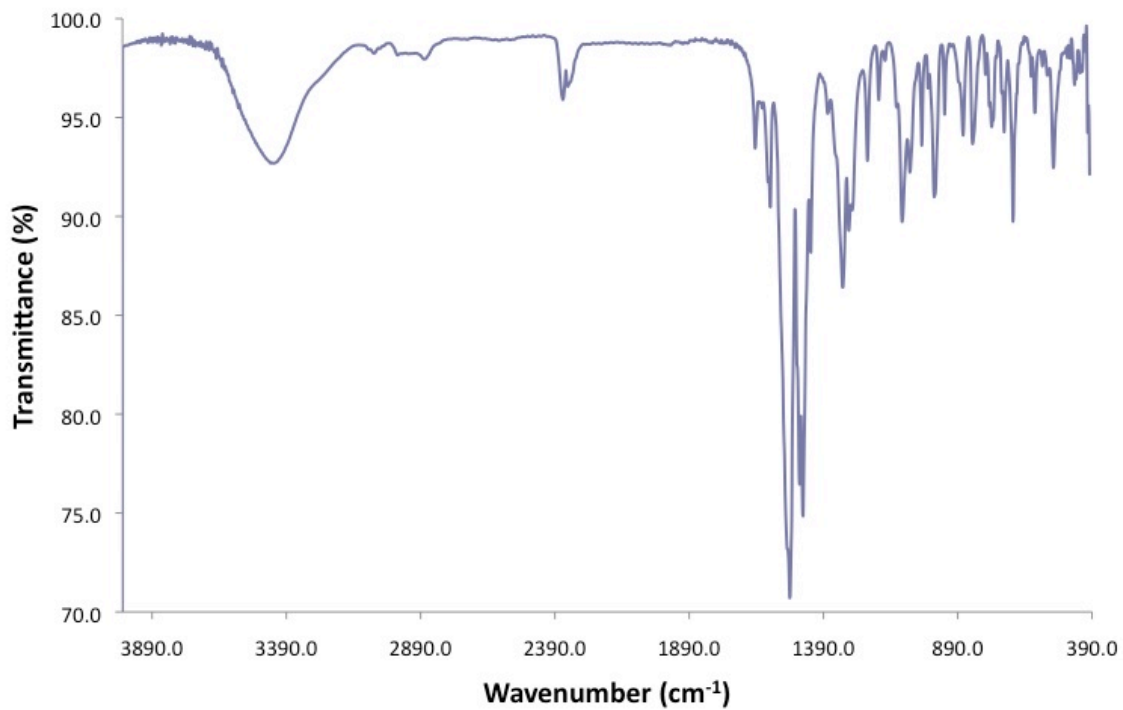

**Figure S27.** IR spectrum of complex **4** (as KBr pellet).

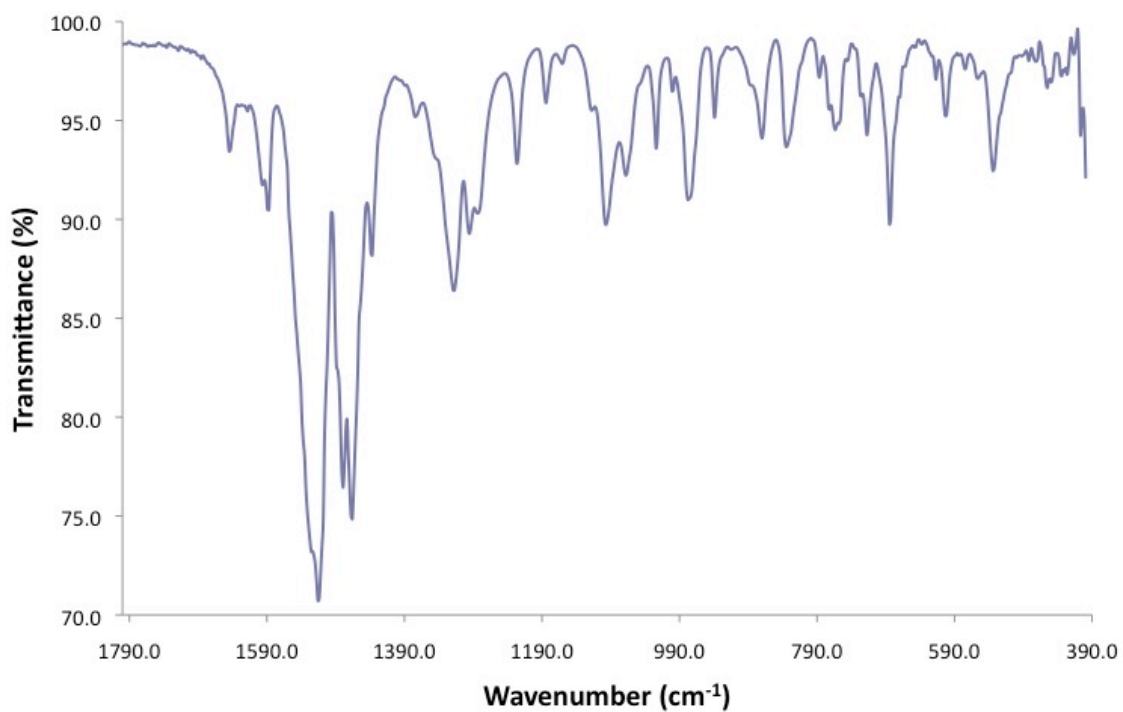

**Figure S28.** Partial IR spectrum of complex **4** (as KBr pellet).

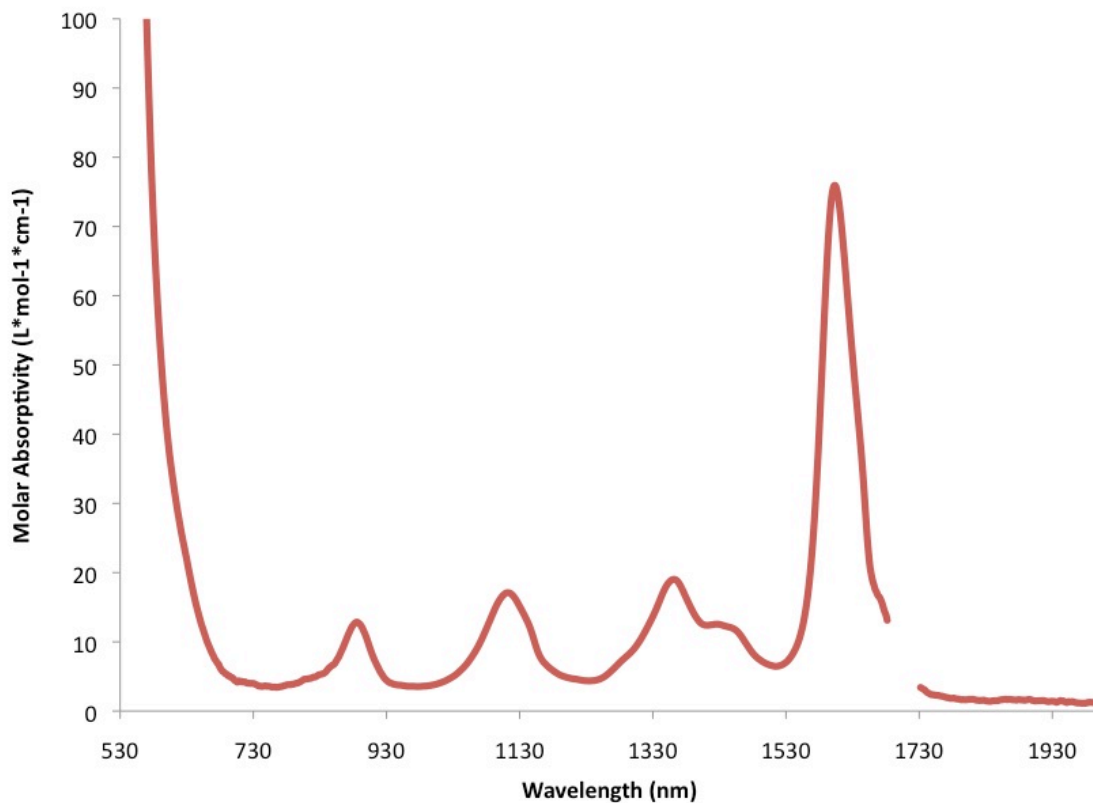

**Figure S29.** UV-vis/NIR spectrum of **1** ( $\text{CH}_2\text{Cl}_2$ ,  $3.85 \times 10^{-3} \text{ M}$ ). Solvent absorption has been removed for clarity.

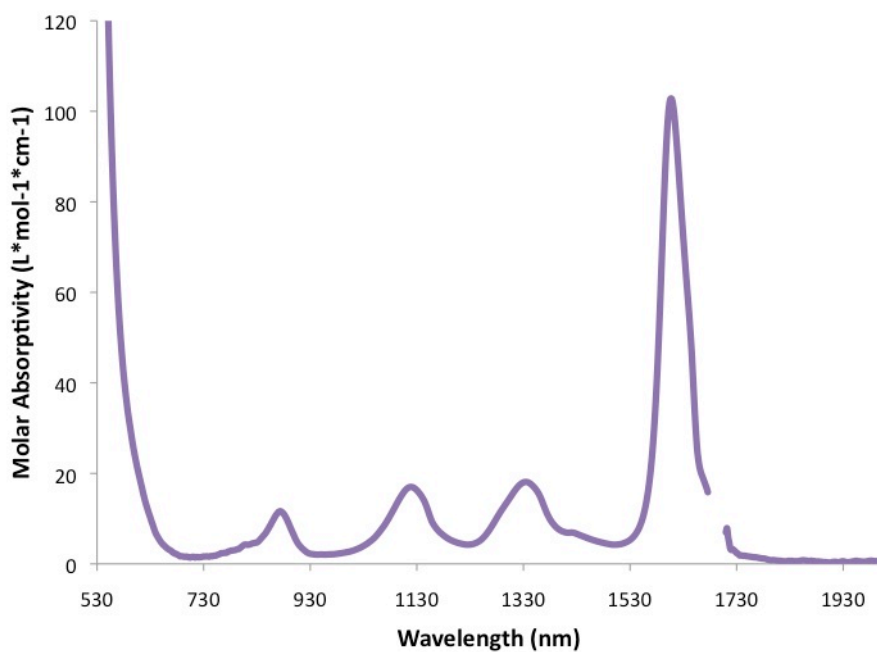

**Figure S30.** UV-vis/NIR spectrum of **2** ( $\text{CH}_2\text{Cl}_2$ ,  $4.15 \times 10^{-3} \text{ M}$ ). Solvent absorption has been removed for clarity.

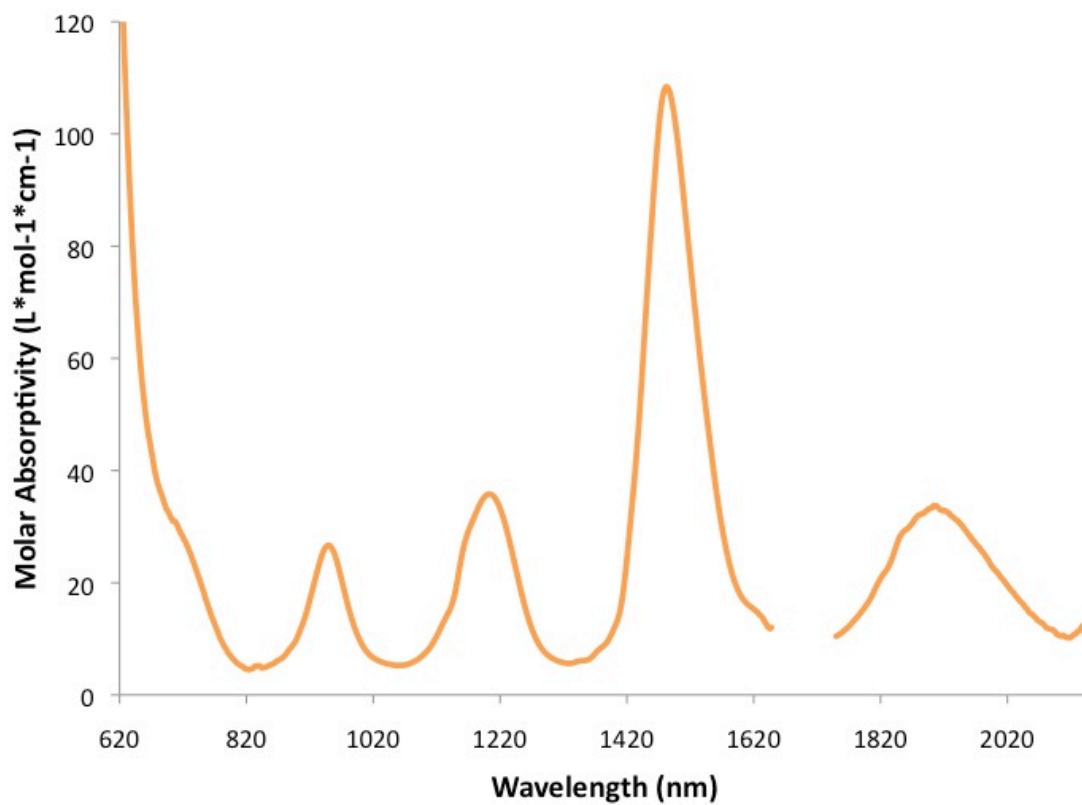

**Figure S31.** UV-vis/NIR spectrum of **4** (CH<sub>2</sub>Cl<sub>2</sub>, 2.75 × 10<sup>-3</sup> M). Solvent absorption has been removed for clarity.



**Table S2. X-ray Crystallographic Data for Complexes 1 – 4**

|                                                              | <b>1</b> ·C <sub>6</sub> H <sub>14</sub>                           | <b>2</b> ·C <sub>7</sub> H <sub>8</sub> ·0.5C <sub>6</sub> H <sub>14</sub> | <b>3</b>                                                           | <b>4</b> ·2C <sub>7</sub> H <sub>8</sub> ·C <sub>6</sub> H <sub>14</sub> |
|--------------------------------------------------------------|--------------------------------------------------------------------|----------------------------------------------------------------------------|--------------------------------------------------------------------|--------------------------------------------------------------------------|
| empirical formula                                            | UO <sub>7</sub> BF <sub>15</sub> SiC <sub>76</sub> H <sub>59</sub> | UO <sub>7</sub> BF <sub>15</sub> SiC <sub>6</sub> 8H <sub>60</sub>         | UO <sub>6</sub> BF <sub>15</sub> SiC <sub>54</sub> H <sub>37</sub> | UO <sub>7</sub> BF <sub>15</sub> C <sub>73</sub> H <sub>48</sub>         |
| Crystal habit, color                                         | plate, red-orange                                                  | plate, red                                                                 | plate, red-orange                                                  | plate, red                                                               |
| crystal size (mm)                                            | 0.35 × 0.30 × 0.30                                                 | 0.40 × 0.30 × 0.10                                                         | 0.10 × 0.08 × 0.05                                                 | 0.20 × 0.15 × 0.10                                                       |
| crystal system                                               | triclinic                                                          | triclinic                                                                  | triclinic                                                          | triclinic                                                                |
| space group                                                  | <i>P</i> -1                                                        | <i>P</i> -1                                                                | <i>P</i> -1                                                        | <i>P</i> 1                                                               |
| vol (Å <sup>3</sup> )                                        | 3411.96(16)                                                        | 3202.79(11)                                                                | 2555.2(2)                                                          | 3157.04(16)                                                              |
| a (Å)                                                        | 13.6767(4)                                                         | 12.8552(3)                                                                 | 12.0721(6)                                                         | 15.1204(4)                                                               |
| b (Å)                                                        | 15.7946(4)                                                         | 15.7463(3)                                                                 | 12.2867(7)                                                         | 16.1764(5)                                                               |
| c (Å)                                                        | 16.3191(4)                                                         | 16.5535(3)                                                                 | 17.8840(11)                                                        | 16.4479(5)                                                               |
| α (deg)                                                      | 102.448(2)                                                         | 100.009(1)                                                                 | 89.672(4)                                                          | 112.966(2)                                                               |
| β (deg)                                                      | 93.042(2)                                                          | 103.592(1)                                                                 | 80.120(4)                                                          | 96.391(2)                                                                |
| γ (deg)                                                      | 96.154(2)                                                          | 90.593(1)                                                                  | 78.024(4)                                                          | 115.286(2)                                                               |
| Z                                                            | 2                                                                  | 2                                                                          | 2                                                                  | 2                                                                        |
| fw (g/mol)                                                   | 1646.16                                                            | 1551.09                                                                    | 1343.77                                                            | 1570.95                                                                  |
| density (calcd) (Mg/m <sup>3</sup> )                         | 1.602                                                              | 1.608                                                                      | 1.747                                                              | 1.653                                                                    |
| abs coeff (mm <sup>-1</sup> )                                | 2.493                                                              | 2.650                                                                      | 3.305                                                              | 2.672                                                                    |
| F <sub>000</sub>                                             | 1634.0                                                             | 1540.0                                                                     | 1310.0                                                             | 1548.0                                                                   |
| Total no. reflections                                        | 35645                                                              | 31034                                                                      | 30650                                                              | 32024                                                                    |
| Unique reflections                                           | 13946                                                              | 15762                                                                      | 12728                                                              | 24983                                                                    |
| final R indices [I > 2σ(I)]                                  | R <sub>1</sub> = 0.0266<br>wR <sub>2</sub> = 0.0647                | R <sub>1</sub> = 0.0281<br>wR <sub>2</sub> = 0.0783                        | R <sub>1</sub> = 0.0388<br>wR <sub>2</sub> = 0.1047                | R <sub>1</sub> = 0.0468<br>wR <sub>2</sub> = 0.1062                      |
| largest diff peak and hole (e <sup>-</sup> Å <sup>-3</sup> ) | 1.960 and -1.180                                                   | 2.493 and -0.716                                                           | 6.198 and -1.785                                                   | 1.486 and -2.212                                                         |
| GOF                                                          | 1.032                                                              | 1.097                                                                      | 1.047                                                              | 0.975                                                                    |

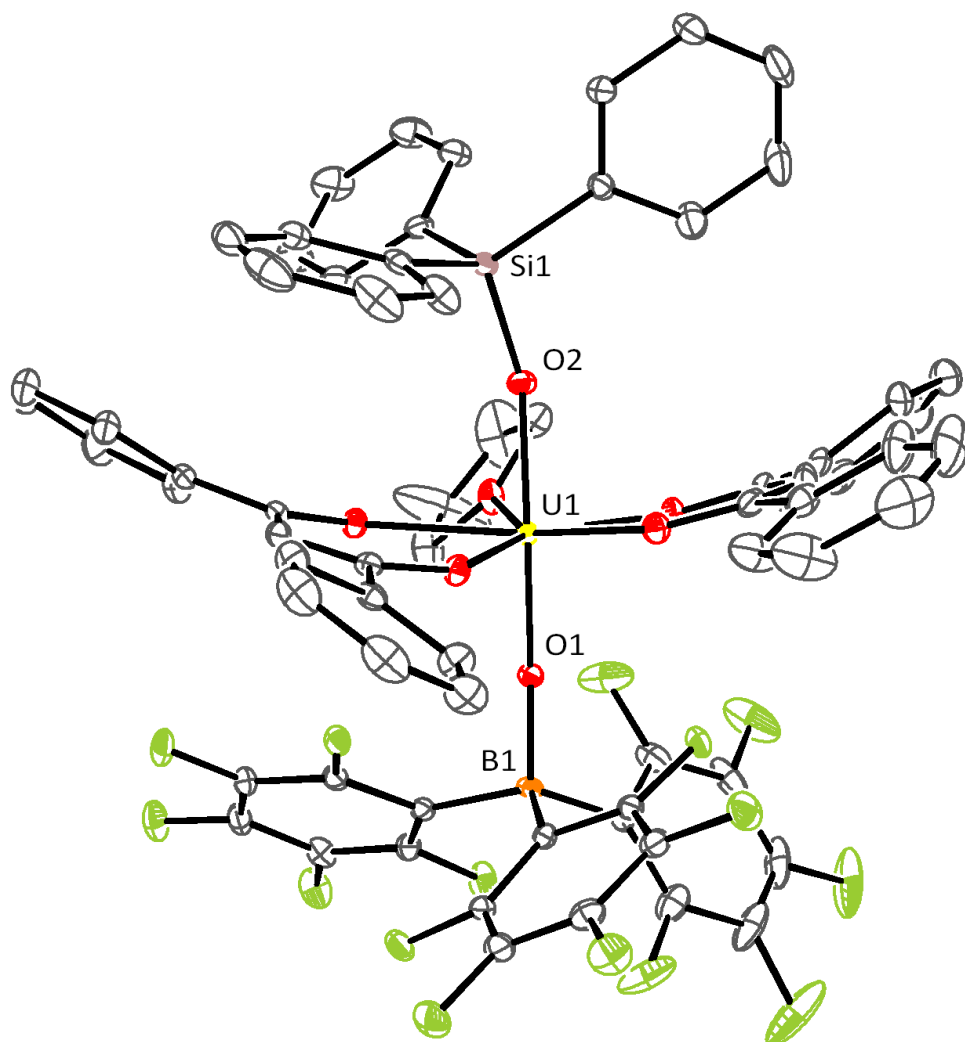

**Figure S32.** Solid-state molecular structure of  $\text{U}(\text{OB}\{\text{C}_6\text{F}_5\}_3)(\text{OSiPh}_3)(\text{dbm})_2(\text{THF})\cdot\text{C}_6\text{H}_{14}$  ( $\mathbf{1}\cdot\text{C}_6\text{H}_{14}$ ) with 50% probability ellipsoids. Solvate molecule and hydrogen atoms have been omitted for clarity

## Converged Cartesian coordinates and total SCF energies

### Complex 4 (PBE)

-4942.3498465 H

B 2.153260 -0.908788 -0.097940  
C -4.218138 1.471202 0.038070  
C -4.848018 0.248072 -0.245077  
H -5.927259 0.252060 -0.420554  
C -4.134068 -0.974438 -0.361885  
C -4.807089 -2.266590 -0.679619  
C -3.999131 -3.412407 -0.875219  
H -2.909305 -3.317462 -0.780222  
C -4.579876 -4.647474 -1.184232  
H -3.933969 -5.524755 -1.334805  
C -5.975416 -4.763122 -1.298545  
H -6.432592 -5.733927 -1.540158  
C -6.787502 -3.633805 -1.100099  
H -7.880607 -3.719370 -1.183261  
C -6.210260 -2.395312 -0.793683  
H -6.865190 -1.527660 -0.634944  
C -4.984003 2.741399 0.161071  
C -6.380360 2.763226 0.382997  
H -6.935935 1.822426 0.500551  
C -7.063478 3.980154 0.492514  
H -8.147771 3.981575 0.675331  
C -6.366397 5.194659 0.378214  
H -6.905949 6.149398 0.461707  
C -4.978373 5.184353 0.163706  
H -4.427351 6.131797 0.074386  
C -4.290095 3.969664 0.063200  
H -3.204770 3.950030 -0.104244  
C -0.030336 2.482421 -2.279706  
C -0.064505 1.550416 -3.340999  
H 0.215748 1.875904 -4.346837  
C -0.527465 0.227290 -3.175673  
C -0.571617 -0.730777 -4.312313  
C 0.282792 -0.605298 -5.431108  
H 1.044316 0.185444 -5.460394  
C 0.213937 -1.531763 -6.478807  
H 0.896741 -1.434712 -7.335120  
C -0.708275 -2.589992 -6.428625  
H -0.760927 -3.314121 -7.254875  
C -1.551635 -2.729955 -5.313514  
H -2.269337 -3.561829 -5.265011  
C -1.477926 -1.814511 -4.257698

H -2.125628 -1.919124 -3.376503  
C 0.409920 3.892901 -2.471620  
C 0.251791 4.803487 -1.400516  
H -0.189853 4.439332 -0.462775  
C 0.657082 6.136393 -1.532603  
H 0.524775 6.832461 -0.691343  
C 1.237482 6.582353 -2.731526  
H 1.562274 7.628131 -2.833921  
C 1.413025 5.683650 -3.796488  
H 1.883692 6.020272 -4.731191  
C 1.001164 4.351759 -3.671100  
H 1.173359 3.661597 -4.507474  
C -1.098138 -0.485109 3.405299  
C -0.454634 0.668344 3.895085  
H -0.118576 0.680614 4.936420  
C -0.161367 1.786645 3.078465  
C -1.416958 -1.644106 4.279164  
C -1.674714 -2.897995 3.678320  
H -1.611669 -2.981786 2.585084  
C -1.977637 -4.011908 4.468958  
H -2.163162 -4.984885 3.991351  
C -2.039557 -3.890815 5.867316  
H -2.279882 -4.766957 6.487339  
C -1.794486 -2.647186 6.472961  
H -1.850600 -2.545185 7.566358  
C -1.482780 -1.531849 5.686420  
H -1.314239 -0.559991 6.170881  
C 0.530629 2.983727 3.630291  
C 1.307190 3.783888 2.760567  
H 1.407473 3.485642 1.708284  
C 1.975928 4.912254 3.249891  
H 2.594879 5.514601 2.568994  
C 1.865368 5.268931 4.604401  
H 2.388241 6.158405 4.985624  
C 1.087482 4.485314 5.472850  
H 0.990412 4.765757 6.531722  
C 0.429383 3.346217 4.992158  
H -0.193910 2.750257 5.673966  
C 3.034463 -1.013180 1.289726  
C 2.436147 -1.554534 2.438766  
C 3.076595 -1.669812 3.679073  
C 4.411733 -1.261000 3.792110  
C 5.069664 -0.751215 2.665746  
C 4.378519 -0.639399 1.448541  
C 1.879510 -2.451493 -0.596721  
C 2.963438 -3.249360 -1.001515  
C 2.847910 -4.591132 -1.385708

C 1.585592 -5.202844 -1.366119  
C 0.475742 -4.457395 -0.955003  
C 0.649197 -3.117982 -0.576790  
C 2.782194 0.108105 -1.225964  
C 3.044068 1.437814 -0.849962  
C 3.464875 2.438889 -1.733010  
C 3.639713 2.117681 -3.085590  
C 3.384193 0.812032 -3.514427  
C 2.956806 -0.157317 -2.591886  
F -0.510331 -2.496541 -0.165480  
F 6.359941 -0.368732 2.763321  
F 5.057956 -1.364645 4.969615  
F 2.429177 -2.171933 4.753163  
F 1.156330 -2.019500 2.378849  
F 2.861316 1.822189 0.442943  
F 3.669174 3.702835 -1.307878  
F 4.000396 3.067990 -3.972889  
F 3.488714 0.512034 -4.832600  
F 2.665341 -1.373619 -3.119690  
F 4.205717 -2.707053 -1.037674  
F 3.926608 -5.299167 -1.775284  
F 1.445351 -6.490742 -1.733533  
F -0.751168 -5.032296 -0.919717  
F 5.094769 -0.144094 0.409065  
O 0.820556 -0.250154 0.236214  
O -2.921840 1.580231 0.190525  
O -2.857314 -1.022703 -0.208588  
O -1.448561 -0.601527 2.155373  
O -0.460340 1.829700 1.819946  
O -0.979125 -0.213864 -2.038695  
O -0.403656 2.160787 -1.078341  
U -1.037249 0.358769 0.158682

**Complex 4 (PBE0)**

-4942.4450355 H

B 1.994428 -1.148358 0.253380  
C -3.982355 1.809286 -0.607562  
C -4.702037 0.639291 -0.824745  
H -5.754942 0.721142 -1.071338  
C -4.095176 -0.637890 -0.792635  
C -4.866163 -1.879663 -1.055999  
C -4.170141 -3.098957 -1.060485  
H -3.097339 -3.095913 -0.867635  
C -4.839637 -4.292178 -1.305844  
H -4.281721 -5.230490 -1.306531  
C -6.213486 -4.286490 -1.546766  
H -6.740735 -5.223382 -1.738617  
C -6.915203 -3.080776 -1.540371  
H -7.990901 -3.072255 -1.725476  
C -6.247811 -1.885098 -1.297252  
H -6.817510 -0.955498 -1.292835  
C -4.625802 3.142989 -0.652666  
C -6.012645 3.309651 -0.523849  
H -6.657122 2.445861 -0.355348  
C -6.576477 4.579535 -0.572549  
H -7.655855 4.697343 -0.460407  
C -5.765280 5.699583 -0.755788  
H -6.210653 6.695694 -0.796934  
C -4.385050 5.544330 -0.878688  
H -3.746038 6.417993 -1.019959  
C -3.816926 4.276544 -0.819451  
H -2.738541 4.143697 -0.910573  
C 0.577990 2.253602 -2.438079  
C 0.582147 1.255502 -3.423691  
H 1.033269 1.460065 -4.389169  
C -0.062379 0.024366 -3.238381  
C -0.071195 -1.005215 -4.303632  
C 0.934559 -1.076397 -5.277340  
H 1.783081 -0.392463 -5.244390  
C 0.892498 -2.064237 -6.255665  
H 1.690631 -2.123339 -6.997803  
C -0.154772 -2.984694 -6.278034  
H -0.186309 -3.757029 -7.049396  
C -1.153048 -2.927078 -5.305214  
H -1.969777 -3.651446 -5.314247  
C -1.106404 -1.950983 -4.316680  
H -1.873495 -1.902532 -3.542832  
C 1.205722 3.580324 -2.662587  
C 0.992425 4.588317 -1.710363

H 0.374408 4.362662 -0.840568  
C 1.564712 5.844973 -1.871440  
H 1.387781 6.620953 -1.124012  
C 2.368946 6.110232 -2.979450  
H 2.825266 7.094496 -3.103347  
C 2.598954 5.110858 -3.924311  
H 3.242006 5.306453 -4.784068  
C 2.019980 3.856172 -3.770522  
H 2.234176 3.083528 -4.508855  
C -1.566532 0.048793 3.191702  
C -0.827400 1.142324 3.650543  
H -0.622259 1.230011 4.713093  
C -0.296327 2.111114 2.779128  
C -2.158169 -0.940219 4.120196  
C -2.529022 -2.195459 3.616530  
H -2.355254 -2.410133 2.561854  
C -3.085867 -3.152381 4.456820  
H -3.359031 -4.130887 4.057425  
C -3.290970 -2.865346 5.806257  
H -3.730378 -3.617016 6.465345  
C -2.935028 -1.615862 6.313556  
H -3.102050 -1.384224 7.367090  
C -2.369522 -0.659582 5.477444  
H -2.113440 0.320447 5.882046  
C 0.456610 3.273994 3.308122  
C 1.424695 3.875642 2.490947  
H 1.617786 3.458168 1.502446  
C 2.155365 4.963079 2.957286  
H 2.922203 5.410612 2.321983  
C 1.915307 5.474243 4.232850  
H 2.486974 6.331020 4.595800  
C 0.945523 4.888707 5.046470  
H 0.748476 5.292104 6.041532  
C 0.224490 3.789790 4.590526  
H -0.545196 3.348560 5.225956  
C 2.644647 -1.194400 1.757705  
C 1.831188 -1.550915 2.831393  
C 2.263933 -1.604857 4.149844  
C 3.593891 -1.323734 4.433491  
C 4.455817 -0.999485 3.394903  
C 3.973727 -0.943186 2.090105  
C 1.628322 -2.692225 -0.141582  
C 2.655761 -3.621647 -0.298125  
C 2.447775 -4.966852 -0.569841  
C 1.146319 -5.442131 -0.690155  
C 0.088784 -4.560482 -0.528773  
C 0.349895 -3.221875 -0.254628

C 2.888709 -0.330596 -0.846004  
C 3.251021 0.984825 -0.553135  
C 3.910537 1.827403 -1.436362  
C 4.236484 1.352580 -2.700427  
C 3.892378 0.055409 -3.044838  
C 3.226065 -0.754206 -2.127529  
F -0.758802 -2.454995 -0.094691  
F 5.737251 -0.740486 3.657512  
F 4.038779 -1.372041 5.687425  
F 1.423619 -1.926848 5.135696  
F 0.545287 -1.882323 2.614211  
F 2.940653 1.510133 0.643686  
F 4.208470 3.081847 -1.097253  
F 4.836201 2.147698 -3.586771  
F 4.155347 -0.389684 -4.279842  
F 2.883046 -1.969833 -2.575653  
F 3.926584 -3.213258 -0.191400  
F 3.472794 -5.804401 -0.718611  
F 0.919182 -6.726995 -0.952630  
F -1.171359 -5.001228 -0.632128  
F 4.874148 -0.629906 1.149926  
O 0.718371 -0.336087 0.326460  
O -2.706856 1.817593 -0.378775  
O -2.860273 -0.785840 -0.548827  
O -1.777462 -0.160353 1.938563  
O -0.417030 2.048124 1.510198  
O -0.709923 -0.264855 -2.170386  
O 0.015137 2.086227 -1.300057  
U -0.981438 0.475107 -0.048871



[UOCl<sub>5</sub>]- (PBE0)

-2852.8912231

|    |           |           |           |
|----|-----------|-----------|-----------|
| U  | 0.000000  | 0.000000  | 0.162153  |
| Cl | 0.000000  | 0.000000  | -2.315518 |
| O  | 0.000000  | 0.000000  | 1.913049  |
| Cl | 0.000000  | 2.547269  | 0.134431  |
| Cl | 0.000000  | -2.547269 | 0.134431  |
| Cl | 2.547269  | 0.000000  | 0.134431  |
| Cl | -2.547269 | 0.000000  | 0.134431  |
